# Supplementary material for: Prediction of Protein-Protein Interactions Related to Protein Complexes Based on Protein Interaction Networks
Source: Hindawi journal article supplement (doi:10.1155/2015/259157), 2015-01-01
Supplement: f1 [file 259157.f1.pdf]

# Prediction of protein-protein interactions related to protein complexes based on protein interaction networks

## Supplementary materials

### Content

|                                                                                              |           |
|----------------------------------------------------------------------------------------------|-----------|
| <b>S1. PPI predictions based on the detected complexes derived from MCODE (M) .....</b>      | <b>1</b>  |
| <b>S2. PPI predictions based on the detected complexes derived from COACH (C) .....</b>      | <b>2</b>  |
| <b>S3. PPI predictions based on the detected complexes derived from NDComplex (N).....</b>   | <b>5</b>  |
| <b>S4. PPIs predicted at least twice based on the prediction set N (N<sup>+</sup>) .....</b> | <b>20</b> |

### S1. PPI predictions based on the detected complexes derived from MCODE (M)

|             |       |             |       |             |       |
|-------------|-------|-------------|-------|-------------|-------|
| [1] RNA14   | YTH1  | [2] RNA14   | GLC7  | [3] RNA14   | PTI1  |
| [4] PFS2    | GLC7  | [5] GLC7    | PTI1  | [6] YSH1    | PTI1  |
| [7] REF2    | FIP1  | [8] RPN5    | RAD23 | [9] RPT2    | RPN8  |
| [10] RPT2   | RPN9  | [11] RPT2   | RPN7  | [12] RPN12  | UBP6  |
| [13] PRE1   | UBP6  | [14] RPN8   | RPN7  | [15] UBP6   | RAD23 |
| [16] UBP6   | RPN7  | [17] RPN9   | RPN7  | [18] RAD23  | RPN7  |
| [19] RAD23  | RPN11 | [20] RPN7   | RPN11 | [21] DCP1   | PAT1  |
| [22] APC4   | CDC16 | [23] RPF2   | NOP4  | [24] MAK21  | RIX1  |
| [25] MAK21  | TIF6  | [26] RLP7   | CIC1  | [27] RLP7   | HAS1  |
| [28] RLP7   | RIX1  | [29] RLP7   | YTM1  | [30] RLP7   | NOP7  |
| [31] RLP7   | NOC2  | [32] CIC1   | HAS1  | [33] CIC1   | RIX1  |
| [34] CIC1   | NOP7  | [35] CIC1   | TIF6  | [36] HAS1   | RIX1  |
| [37] HAS1   | YTM1  | [38] HAS1   | NOC2  | [39] ERB1   | RIX1  |
| [40] RIX1   | YTM1  | [41] RIX1   | NOP4  | [42] RIX1   | NOP7  |
| [43] RIX1   | NOC2  | [44] RIX1   | SSF1  | [45] YTM1   | NOC2  |
| [46] YTM1   | SSF1  | [47] NOP4   | TIF6  | [48] NOP7   | NOC2  |
| [49] NOC2   | TIF6  | [50] SWD2   | SHG1  | [51] SWD2   | SDC1  |
| [52] RRP43  | RRP6  | [53] RRP43  | SKI7  | [54] RRP43  | RRP42 |
| [55] RRP43  | MTR3  | [56] RRP6   | SKI7  | [57] RRP6   | RRP4  |
| [58] RRP6   | RRP42 | [59] RRP6   | MTR3  | [60] SKI7   | RRP42 |
| [61] SKI7   | MTR3  | [62] SKI7   | SRP1  | [63] RRP4   | MTR3  |
| [64] RRP42  | SRP1  | [65] MTR3   | SRP1  | [66] SUI1   | SUA7  |
| [67] PRP40  | PRP42 | [68] ROX3   | SRB6  | [69] ROX3   | MED2  |
| [70] ROX3   | SPT15 | [71] SRB6   | SPT15 | [72] MED2   | SPT15 |
| [73] SRB4   | SPT15 | [74] GAL11  | SPT15 | [75] SPT15  | MED7  |
| [76] SNU114 | PRP6  | [77] SNU114 | PRP3  | [78] SNU114 | SNU66 |
| [79] PRP6   | SNU66 | [80] PRP3   | SNU66 | [81] ATP7   | IPI3  |
| [82] ATP17  | IPI3  | [83] ATP2   | IPI3  | [84] ATP18  | IPI3  |
| [85] ATP6   | IPI3  | [86] MUD1   | LUC7  | [87] MUD1   | PRP4  |
| [88] SMX2   | PRP39 | [89] SNU56  | PRP39 | [90] SNU56  | CBC1  |
| [91] SNU56  | PRP4  | [92] PRP39  | CBC1  | [93] PRP39  | PRP4  |
| [94] CBC1   | PRP4  | [95] SNU71  | PRP4  | [96] LUC7   | PRP4  |
| [97] NOP2   | NOP15 | [98] NOP15  | MAK5  | [99] MAK5   | NSA2  |

|       |         |         |       |         |         |       |         |         |
|-------|---------|---------|-------|---------|---------|-------|---------|---------|
| [100] | TAF9    | TAF12   | [101] | TAF9    | ADR1    | [102] | TAF9    | NOT3    |
| [103] | TAF12   | ADR1    | [104] | TAF12   | TAF11   | [105] | TAF12   | NOT3    |
| [106] | ADR1    | TAF11   | [107] | ADR1    | TAF13   | [108] | ADR1    | NOT3    |
| [109] | TAF11   | NOT3    | [110] | TAF11   | TAF6    | [111] | TAF5    | NOT3    |
| [112] | TAF13   | NOT3    | [113] | NOT3    | TAF6    | [114] | NOT5    | POP2    |
| [115] | NOT2    | POP2    | [116] | NOT2    | CAF130  | [117] | SPT5    | SPT16   |
| [118] | RTF1    | SPT16   | [119] | SPT16   | LEO1    | [120] | CSG2    | AGP1    |
| [121] | PPA1    | GSF2    | [122] | GSF2    | YET1    | [123] | ARP4    | EAF3    |
| [124] | YOP1    | EMP24   | [125] | YOP1    | ELO2    | [126] | YOP1    | TP03    |
| [127] | EMP24   | SSH1    | [128] | EMP24   | TP03    | [129] | SSH1    | TP03    |
| [130] | RPB7    | SIN4    | [131] | SIN4    | RPB9    | [132] | SIN4    | RPB4    |
| [133] | SIN4    | RPB3    | [134] | RPB3    | RPB1    | [135] | PRE10   | PRE4    |
| [136] | PRE10   | PRE9    | [137] | PRE10   | PUP3    | [138] | PRE4    | PRE9    |
| [139] | PRE4    | PUP3    | [140] | PRE9    | PUP3    | [141] | SEC28   | SEC21   |
| [142] | SEC28   | RET3    | [143] | SEC28   | SEC26   | [144] | SEC21   | RET3    |
| [145] | SEC21   | SEC26   | [146] | RET3    | SEC26   | [147] | GPI2    | TSC13   |
| [148] | YPL264C | ELO1    | [149] | YPL264C | GAS3    | [150] | VPS8    | VPS41   |
| [151] | UBP7    | CHA1    | [152] | MY03    | CHA1    | [153] | MY05    | CHA1    |
| [154] | PMP1    | TLG2    | [155] | PMP1    | PMP2    | [156] | TLG2    | YLL023C |
| [157] | TLG2    | ERV29   | [158] | TLG2    | ELO3    | [159] | ERV29   | ELO3    |
| [160] | TEF1    | YGL081W | [161] | PRP21   | YGL081W | [162] | CUS1    | YGL081W |
| [163] | VPH1    | STV1    | [164] | ASF1    | RLF2    | [165] | NUP1    | SN04    |
| [166] | NUP1    | SNZ2    | [167] | NUP1    | SNZ3    | [168] | RPT4    | ATG12   |
| [169] | RPT4    | RPN3    | [170] | RPT6    | RPN3    | [171] | YGL004C | ATG12   |

## S2. PPI predictions based on the detected complexes derived from COACH (C)

|      |       |       |      |       |        |      |       |         |
|------|-------|-------|------|-------|--------|------|-------|---------|
| [1]  | LEU2  | VMA2  | [2]  | VMA2  | GAL1   | [3]  | CPR1  | SET3    |
| [4]  | CPR1  | ZDS1  | [5]  | HST1  | ZDS1   | [6]  | SLA2  | SLA1    |
| [7]  | SLA2  | SSC1  | [8]  | SLA1  | SSC1   | [9]  | YSC84 | SSC1    |
| [10] | CIC1  | NOP7  | [11] | NOP4  | BUD20  | [12] | NOP4  | PAB1    |
| [13] | SHS1  | BNI5  | [14] | BET1  | SEC22  | [15] | PH086 | ALG1    |
| [16] | PH086 | CSG2  | [17] | PH086 | IFA38  | [18] | PH086 | GSF2    |
| [19] | PH086 | ELO1  | [20] | PH086 | SRP102 | [21] | ALG1  | SUR2    |
| [22] | ALG1  | CSG2  | [23] | ALG1  | AVT4   | [24] | ALG1  | GSF2    |
| [25] | ALG1  | ELO1  | [26] | ALG1  | SRP102 | [27] | ALG1  | YPC1    |
| [28] | GPI8  | CSG2  | [29] | GPI8  | EMP24  | [30] | GPI8  | YPL264C |
| [31] | GPI8  | AVT4  | [32] | GPI8  | ERG25  | [33] | GPI8  | COS8    |
| [34] | GPI2  | TSC13 | [35] | GPI2  | EMP24  | [36] | GPI2  | FET3    |
| [37] | SUR2  | CSG2  | [38] | SUR2  | TSC13  | [39] | SUR2  | AVT4    |
| [40] | SUR2  | ERG25 | [41] | SUR2  | COS8   | [42] | SUR2  | GAS3    |
| [43] | SUR2  | YPC1  | [44] | SUR2  | FET3   | [45] | CSG2  | EMP24   |
| [46] | CSG2  | AVT4  | [47] | CSG2  | ERG25  | [48] | CSG2  | COS8    |
| [49] | CSG2  | YPC1  | [50] | CSG2  | FET3   | [51] | TSC13 | YPC1    |
| [52] | TSC13 | FET3  | [53] | IFA38 | ELO2   | [54] | IFA38 | SRP102  |

|                     |                     |                     |
|---------------------|---------------------|---------------------|
| [55] IFA38 PH088    | [56] IFA38 EL03     | [57] IFA38 YET1     |
| [58] EMP24 YPL264C  | [59] EMP24 AVT4     | [60] EMP24 COS8     |
| [61] EMP24 EL01     | [62] EMP24 YPC1     | [63] EMP24 FET3     |
| [64] YPL264C AVT4   | [65] YPL264C COS8   | [66] YPL264C EL01   |
| [67] YPL264C GAS3   | [68] YPL264C YPC1   | [69] AVT4 COS8      |
| [70] AVT4 GAS3      | [71] AVT4 FET3      | [72] ERG25 COS8     |
| [73] ERG25 EL01     | [74] ERG25 FET3     | [75] GSF2 EL01      |
| [76] GSF2 EL02      | [77] GSF2 SRP102    | [78] GSF2 PH088     |
| [79] GSF2 YET1      | [80] COS8 GAS3      | [81] COS8 FET3      |
| [82] EL01 YPC1      | [83] EL02 SRP102    | [84] EL02 PH088     |
| [85] EL02 EL03      | [86] EL02 YET1      | [87] SRP102 PH088   |
| [88] SRP102 EL03    | [89] SRP102 YET1    | [90] GAS3 YPC1      |
| [91] GAS3 FET3      | [92] PH088 EL03     | [93] PH088 YET1     |
| [94] EL03 YET1      | [95] YPC1 FET3      | [96] HSP60 TUB2     |
| [97] PFK2 TUB2      | [98] YNL132W NOP1   | [99] YNL132W UTP20  |
| [100] KRR1 UTP22    | [101] NOP1 UTP20    | [102] RPN12 YGL004C |
| [103] RPN12 UBP6    | [104] RPN12 ATG12   | [105] RPT6 RPN8     |
| [106] RPT6 RPN9     | [107] RPT6 RPN3     | [108] PRE1 YGL004C  |
| [109] PRE1 UBP6     | [110] PRE1 ATG12    | [111] YGL004C UBP6  |
| [112] YGL004C ATG12 | [113] RPN8 ATG12    | [114] RPN8 RPN3     |
| [115] UBP6 ATG12    | [116] ATG12 RPN9    | [117] RPN9 RPN3     |
| [118] LEU2 TPD3     | [119] SPP381 SMX3   | [120] SPP381 SMX2   |
| [121] RSE1 PRP11    | [122] RSE1 PRP21    | [123] SMX3 SMX2     |
| [124] SMX3 PRP11    | [125] SMX3 PRP21    | [126] CIC1 HAS1     |
| [127] CIC1 PUF6     | [128] CIC1 TIF6     | [129] HAS1 PUF6     |
| [130] HAS1 YTM1     | [131] PUF6 ERB1     | [132] PUF6 YTM1     |
| [133] PUF6 NOP7     | [134] NUP145 NUP133 | [135] PPH1 RAD59    |
| [136] ARP2 RAD59    | [137] LEU2 CDC15    | [138] YKU80 CDC15   |
| [139] SEC63 EL03    | [140] UTP18 NOP7    | [141] UTP22 NOP7    |
| [142] NOP7 CKB1     | [143] STT3 SWP1     | [144] RPN10 PPH22   |
| [145] PRE6 PRE9     | [146] PRE6 PUP3     | [147] PRE6 PRE5     |
| [148] PRE9 PUP3     | [149] PRE9 PRE5     | [150] PUP3 PRE5     |
| [151] RNA14 YTH1    | [152] RNA14 PTI1    | [153] CFT1 DBP4     |
| [154] DBP4 MPE1     | [155] DBP4 YTH1     | [156] YSH1 PTI1     |
| [157] REF2 FIP1     | [158] VMA2 VMA8     | [159] NOT5 SSN2     |
| [160] NOT5 POP2     | [161] SSN2 NOT4     | [162] SSN2 NOT3     |
| [163] SSN2 CAF130   | [164] NOT2 POP2     | [165] NOT2 NOT3     |
| [166] NOT2 CAF130   | [167] NOT3 CCR4     | [168] LSB3 RVS167   |
| [169] LSB3 YSC84    | [170] GCN4 TAF12    | [171] GCN4 SPT7     |
| [172] GCN4 TAF10    | [173] GCN4 TAF13    | [174] TAF9 TAF12    |
| [175] TAF9 SPT15    | [176] TAF12 SPT7    | [177] TAF12 NGG1    |
| [178] TAF12 ADA2    | [179] SPT7 TAF1     | [180] SPT7 SPT15    |
| [181] SPT7 TAF13    | [182] NGG1 TAF10    | [183] NGG1 TAF13    |
| [184] SPT15 TAF10   | [185] SPT15 TAF13   | [186] TAF13 ADA2    |

|                    |                   |                    |
|--------------------|-------------------|--------------------|
| [187] SED5 NYV1    | [188] VMA4 TFP1   | [189] ROX3 SRB6    |
| [190] ROX3 MED2    | [191] ROX3 GAL4   | [192] ROX3 ADA2    |
| [193] SSN3 GAL11   | [194] SSN3 MED8   | [195] SSN3 MED6    |
| [196] SSN3 SRB2    | [197] SSN3 MED7   | [198] SSN3 ADA2    |
| [199] MED2 GAL4    | [200] MED2 ADA2   | [201] GAL11 ADA2   |
| [202] MED8 MED6    | [203] MED8 GAL4   | [204] MED8 ADA2    |
| [205] SRB5 MED6    | [206] SRB5 ADA2   | [207] MED6 SRB2    |
| [208] MED6 GAL4    | [209] MED6 ADA2   | [210] GAL4 MED7    |
| [211] HTZ1 ESA1    | [212] SWR1 TRA1   | [213] SWR1 ESA1    |
| [214] SWR1 EPL1    | [215] ACT1 TRA1   | [216] TRA1 RVB2    |
| [217] ESA1 RVB2    | [218] RVB2 EPL1   | [219] STI1 GAL1    |
| [220] NUP100 NUP60 | [221] NUP60 PSE1  | [222] PSE1 NUP2    |
| [223] SLA1 BBC1    | [224] BBC1 RVS167 | [225] RPB2 RPB8    |
| [226] RPB3 RPB1    | [227] RPB4 RPB8   | [228] FPR1 RPC5    |
| [229] NNF1 SPC24   | [230] SPC24 NUF2  | [231] PFK2 KAR2    |
| [232] YKU80 KAR2   | [233] LSM3 PRP6   | [234] LSM3 SMD3    |
| [235] LSM2 BRR2    | [236] LSM2 SNU114 | [237] LSM2 PRP6    |
| [238] LSM2 PRP4    | [239] BRR2 LSM6   | [240] BRR2 LSM7    |
| [241] BRR2 LSM1    | [242] BRR2 LSM5   | [243] SNU114 LSM6  |
| [244] SNU114 PRP6  | [245] SNU114 LSM4 | [246] LSM6 PRP6    |
| [247] LSM6 PRP4    | [248] LSM7 PRP31  | [249] LSM7 PRP8    |
| [250] LSM7 SMD3    | [251] PRP31 LSM4  | [252] PRP31 LSM1   |
| [253] PRP31 LSM5   | [254] PRP6 LSM4   | [255] PRP6 LSM1    |
| [256] PRP8 LSM4    | [257] PRP8 LSM1   | [258] PRP8 LSM5    |
| [259] LSM4 PRP4    | [260] LSM1 SMD3   | [261] LSM1 PRP4    |
| [262] SUI1 SUA7    | [263] PDC1 GCD6   | [264] PDC1 GCD7    |
| [265] PDC1 SUI3    | [266] GCD11 GCD2  | [267] GCD11 SUI3   |
| [268] SUI2 GCD7    | [269] GCD2 SUI3   | [270] YKU80 RPC5   |
| [271] RPC5 MKK2    | [272] LSM3 SNU66  | [273] SNU114 PRP3  |
| [274] SNU114 SNU66 | [275] LSM7 PRP3   | [276] PRP6 SNU66   |
| [277] PRP3 SNU66   | [278] MUD1 SMX3   | [279] MUD1 SMD2    |
| [280] MUD1 LUC7    | [281] MUD1 SMD3   | [282] SMX3 SNP1    |
| [283] SMX3 NAM8    | [284] SMX3 YHC1   | [285] SMX3 CBC2    |
| [286] PRP40 SMD2   | [287] PRP40 CBC2  | [288] PRP40 SMD3   |
| [289] PRP40 PRP42  | [290] SMX2 NAM8   | [291] SMX2 CBC2    |
| [292] SMX2 PRP42   | [293] SMD2 SNP1   | [294] SMD2 PRP42   |
| [295] SNP1 SMD3    | [296] YHC1 CBC2   | [297] YHC1 SMD3    |
| [298] CBC2 SMD3    | [299] CBC2 PRP42  | [300] SMD3 PRP42   |
| [301] HSP60 HSP26  | [302] RFA3 MSH2   | [303] MSH2 RAD52   |
| [304] ATP17 HRR25  | [305] HRR25 ATP6  | [306] PFK2 GAL1    |
| [307] ARP2 GAL1    | [308] GPI2 PMP2   | [309] PMP2 YPL264C |
| [310] PMP2 CAN1    | [311] PMP2 SPC1   | [312] YPL264C CAN1 |
| [313] YPL264C SPC1 | [314] LSM3 DCP2   | [315] LSM3 EDC3    |
| [316] DCP2 LSM6    | [317] DCP2 LSM7   | [318] DCP2 SMD3    |

|       |       |         |       |        |       |       |       |         |
|-------|-------|---------|-------|--------|-------|-------|-------|---------|
| [319] | DCP2  | LSM5    | [320] | DCP1   | SMD3  | [321] | DCP1  | PAT1    |
| [322] | LSM6  | EDC3    | [323] | LSM7   | EDC3  | [324] | EDC3  | LSM4    |
| [325] | EDC3  | LSM1    | [326] | EDC3   | SMD3  | [327] | EDC3  | PAT1    |
| [328] | EDC3  | LSM5    | [329] | SMD3   | PAT1  | [330] | RPF2  | MAK5    |
| [331] | RPF2  | NOP4    | [332] | RPF2   | CKA1  | [333] | MAK21 | NOG1    |
| [334] | MAK21 | NSA2    | [335] | MAK21  | TIF6  | [336] | MAK21 | CKA1    |
| [337] | CIC1  | RLP7    | [338] | CIC1   | NOG1  | [339] | CIC1  | NSA2    |
| [340] | RLP7  | HAS1    | [341] | RLP7   | NOP2  | [342] | RLP7  | YTM1    |
| [343] | RLP7  | NOP7    | [344] | RLP7   | NOG1  | [345] | RLP7  | CKA1    |
| [346] | HAS1  | NOG1    | [347] | NOP2   | NOP15 | [348] | YTM1  | NOG1    |
| [349] | YTM1  | NSA2    | [350] | YTM1   | SSF1  | [351] | YTM1  | CKA1    |
| [352] | NOP15 | MAK5    | [353] | NOP15  | SSF1  | [354] | NOP15 | CKA1    |
| [355] | MAK5  | NOP7    | [356] | MAK5   | NSA2  | [357] | MAK5  | TIF6    |
| [358] | MAK5  | CKA1    | [359] | NOP4   | NSA2  | [360] | NOP4  | TIF6    |
| [361] | NOP7  | NOG1    | [362] | NOP7   | NSA2  | [363] | NSA2  | SSF1    |
| [364] | NSA2  | CKA1    | [365] | TIF1   | GAL1  | [366] | SGE1  | YHR140W |
| [367] | SGE1  | GPI2    | [368] | SGE1   | TSC13 | [369] | SGE1  | YPL264C |
| [370] | SGE1  | CAN1    | [371] | SGE1   | GAS3  | [372] | ERP4  | IFA38   |
| [373] | ERP4  | GSF2    | [374] | ERP4   | PHO88 | [375] | ERP4  | EL03    |
| [376] | ERP4  | YET1    | [377] | TSC13  | CAN1  | [378] | CAN1  | GAS3    |
| [379] | SGE1  | PHO86   | [380] | SGE1   | ERG25 | [381] | SGE1  | LAC1    |
| [382] | SGE1  | NSG1    | [383] | GPI2   | NSG1  | [384] | ERG25 | NSG1    |
| [385] | LAC1  | GSF2    | [386] | LAC1   | NSG1  | [387] | BSD2  | SPC1    |
| [388] | CDC4  | MET30   | [389] | RPF2   | IPI3  | [390] | NSA2  | IPI3    |
| [391] | BSD2  | YHR140W | [392] | BSD2   | CSG2  | [393] | BSD2  | ERG25   |
| [394] | BSD2  | CAN1    | [395] | GPI2   | POM34 | [396] | ERG25 | POM34   |
| [397] | ERG25 | CAN1    | [398] | POM34  | CAN1  | [399] | POM34 | GAS3    |
| [400] | CAN1  | YPC1    | [401] | VPS8   | VPS41 | [402] | RPB5  | RPC3    |
| [403] | RPC3  | RPB8    | [404] | BSD2   | GPI8  | [405] | BSD2  | AVT4    |
| [406] | BSD2  | COS8    | [407] | IFA38  | POM34 | [408] | AVT4  | POM34   |
| [409] | POM34 | COS8    | [410] | GPM1   | HSP26 | [411] | MYO3  | UBA1    |
| [412] | MYO5  | UBA1    | [413] | ARP2   | UBA1  | [414] | SLT2  | SEC27   |
| [415] | MET30 | UFD2    | [416] | HRT1   | UFD2  | [417] | ATG12 | SRP1    |
| [418] | APC4  | CDC16   | [419] | KAP123 | PAB1  | [420] | ARP4  | SIR3    |
| [421] | ARP4  | CKA1    | [422] | SIR3   | CKA1  | [423] | HTB1  | CKA1    |
| [424] | YCK1  | TPK1    |       |        |       |       |       |         |

### S3. PPI predictions based on the detected complexes derived from NDComplex (N)

|      |         |       |      |         |         |      |         |       |
|------|---------|-------|------|---------|---------|------|---------|-------|
| [1]  | RPN5    | RAD23 | [2]  | RPN12   | YGL004C | [3]  | RPN12   | UBP6  |
| [4]  | RPN12   | ATG12 | [5]  | PRE1    | YGL004C | [6]  | PRE1    | UBP6  |
| [7]  | PRE1    | ATG12 | [8]  | YGL004C | UBP6    | [9]  | YGL004C | ATG12 |
| [10] | YGL004C | RAD23 | [11] | UBP6    | ATG12   | [12] | UBP6    | RAD23 |
| [13] | UBP6    | RPN7  | [14] | ATG12   | RAD23   | [15] | RAD23   | RPN7  |
| [16] | RAD23   | RPN11 | [17] | RPN7    | RPN11   | [18] | LSM3    | SMD3  |

|       |         |         |       |       |         |       |       |         |
|-------|---------|---------|-------|-------|---------|-------|-------|---------|
| [19]  | DCP1    | PRP24   | [20]  | DCP1  | SMD3    | [21]  | DCP1  | PAT1    |
| [22]  | LSM7    | SMD3    | [23]  | PRP24 | LSM4    | [24]  | PRP24 | LSM1    |
| [25]  | PRP24   | SMD3    | [26]  | PRP24 | PAT1    | [27]  | LSM1  | SMD3    |
| [28]  | SMD3    | PAT1    | [29]  | PH086 | ALG1    | [30]  | PH086 | TP01    |
| [31]  | PH086   | IFA38   | [32]  | PH086 | GSF2    | [33]  | ALG1  | GSF2    |
| [34]  | GPI8    | TP01    | [35]  | GPI8  | EMP24   | [36]  | GPI8  | YPL264C |
| [37]  | GPI8    | ERG25   | [38]  | GPI2  | TP01    | [39]  | GPI2  | TSC13   |
| [40]  | GPI2    | EMP24   | [41]  | TP01  | TSC13   | [42]  | TP01  | EMP24   |
| [43]  | TP01    | YPL264C | [44]  | IFA38 | EL02    | [45]  | IFA38 | PH088   |
| [46]  | IFA38   | EL03    | [47]  | IFA38 | YET1    | [48]  | EMP24 | YPL264C |
| [49]  | YPL264C | GAS3    | [50]  | GSF2  | EL02    | [51]  | GSF2  | PH088   |
| [52]  | GSF2    | YET1    | [53]  | EL02  | PH088   | [54]  | EL02  | EL03    |
| [55]  | EL02    | YET1    | [56]  | PH088 | EL03    | [57]  | PH088 | YET1    |
| [58]  | EL03    | YET1    | [59]  | SUI1  | SUA7    | [60]  | TIF34 | HCR1    |
| [61]  | SUA7    | HCR1    | [62]  | HCR1  | NIP1    | [63]  | NOT2  | CAF16   |
| [64]  | SSN3    | CAF40   | [65]  | SSN3  | CAF16   | [66]  | CAF40 | CAF16   |
| [67]  | CAF16   | NOT1    | [68]  | PH086 | STE24   | [69]  | PH086 | EL01    |
| [70]  | ALG1    | STE24   | [71]  | ALG1  | AVT4    | [72]  | ALG1  | EL01    |
| [73]  | ALG1    | YPC1    | [74]  | BSD2  | YHR140W | [75]  | BSD2  | GPI8    |
| [76]  | BSD2    | AVT4    | [77]  | BSD2  | ERG25   | [78]  | BSD2  | COS8    |
| [79]  | GPI8    | AVT4    | [80]  | GPI8  | COS8    | [81]  | TSC13 | YPC1    |
| [82]  | IFA38   | STE24   | [83]  | STE24 | EL02    | [84]  | STE24 | PH088   |
| [85]  | STE24   | EL03    | [86]  | STE24 | YET1    | [87]  | AVT4  | COS8    |
| [88]  | AVT4    | GAS3    | [89]  | ERG25 | COS8    | [90]  | ERG25 | EL01    |
| [91]  | COS8    | GAS3    | [92]  | EL01  | YPC1    | [93]  | GAS3  | YPC1    |
| [94]  | BOS1    | GPT2    | [95]  | SEC22 | GPT2    | [96]  | SEC21 | GPT2    |
| [97]  | RET1    | GPT2    | [98]  | MUD1  | SMD2    | [99]  | MUD1  | LUC7    |
| [100] | PRP40   | SNU56   | [101] | PRP40 | SMD2    | [102] | PRP40 | CBC2    |
| [103] | PRP40   | PRP42   | [104] | SMX2  | NAM8    | [105] | SMX2  | CBC2    |
| [106] | SMX2    | PRP42   | [107] | SNU56 | SMD2    | [108] | SNU56 | CBC1    |
| [109] | SNU56   | PRP42   | [110] | SMD2  | SNP1    | [111] | SMD2  | PRP42   |
| [112] | YHC1    | CBC2    | [113] | CBC2  | PRP42   | [114] | LSM3  | DCP2    |
| [115] | KEM1    | DCP1    | [116] | KEM1  | LSM6    | [117] | KEM1  | LSM7    |
| [118] | KEM1    | PRP24   | [119] | KEM1  | LSM1    | [120] | KEM1  | LSM5    |
| [121] | DCP2    | LSM6    | [122] | DCP2  | LSM7    | [123] | DCP2  | PRP24   |
| [124] | DCP2    | LSM5    | [125] | DCP2  | SMD3    | [126] | GCN4  | SPT7    |
| [127] | GCN4    | TAF10   | [128] | TAF9  | SPT15   | [129] | SPT7  | TAF1    |
| [130] | SPT7    | SPT15   | [131] | NGG1  | TAF10   | [132] | SPT15 | TAF10   |
| [133] | YHR140W | AGP1    | [134] | TSC13 | AGP1    | [135] | TSC13 | SHR3    |
| [136] | AGP1    | AVT4    | [137] | AGP1  | COS8    | [138] | AGP1  | YPC1    |
| [139] | EL02    | SHR3    | [140] | SHR3  | PH088   | [141] | SHR3  | EL03    |
| [142] | SHR3    | YET1    | [143] | BSD2  | EMP24   | [144] | BSD2  | YPL264C |
| [145] | BSD2    | CAN1    | [146] | GPI8  | CAN1    | [147] | GPI2  | NSG1    |
| [148] | TSC13   | CAN1    | [149] | EMP24 | CAN1    | [150] | EMP24 | NSG1    |

|               |         |               |         |              |         |
|---------------|---------|---------------|---------|--------------|---------|
| [151] YPL264C | CAN1    | [152] YPL264C | NSG1    | [153] ERG25  | CAN1    |
| [154] ERG25   | NSG1    | [155] CAN1    | GAS3    | [156] GCN4   | TAF12   |
| [157] GCN4    | TAF13   | [158] TAF9    | TAF12   | [159] TAF12  | ADA2    |
| [160] SPT15   | TAF13   | [161] TAF13   | ADA2    | [162] WBP1   | YHR140W |
| [163] WBP1    | GPI8    | [164] WBP1    | ERG25   | [165] WBP1   | GAS3    |
| [166] ALG1    | SUR2    | [167] SUR2    | ERG25   | [168] SUR2   | GAS3    |
| [169] PHO86   | CSG2    | [170] ALG1    | CSG2    | [171] GPI8   | CSG2    |
| [172] CSG2    | COS8    | [173] COS8    | CAN1    | [174] TAF5   | GCN5    |
| [175] TAF5    | UBP8    | [176] UBP8    | TAF10   | [177] UBP8   | TAF6    |
| [178] UBP8    | ADA2    | [179] ALG1    | AGP1    | [180] ALG1   | LAC1    |
| [181] BSD2    | AGP1    | [182] YHR140W | LAC1    | [183] GPI8   | AGP1    |
| [184] AGP1    | YPL264C | [185] GSF2    | LAC1    | [186] LAC1   | ELO2    |
| [187] LAC1    | NSG1    | [188] NSG1    | YET1    | [189] PHO86  | BAP3    |
| [190] GPI2    | BAP3    | [191] SMX2    | BRR2    | [192] SMX2   | PRP8    |
| [193] SMX2    | LSM8    | [194] SNU114  | PRP6    | [195] SNU114 | SMB1    |
| [196] SNU114  | PRP3    | [197] PRP6    | SMB1    | [198] PRP8   | SMD1    |
| [199] LSM8    | SMD1    | [200] SMB1    | PRP3    | [201] SMB1   | PRP4    |
| [202] PRP3    | SMD1    | [203] SMD1    | PRP4    | [204] RSE1   | PRP43   |
| [205] RSE1    | SNU114  | [206] PRP8    | PRP45   | [207] SPP381 | PRP8    |
| [208] SPP381  | LSM8    | [209] SPP381  | SMD3    | [210] SNU114 | SNU66   |
| [211] SNU114  | SNU23   | [212] PRP31   | SNU23   | [213] PRP6   | SNU66   |
| [214] PRP6    | SNU23   | [215] PRP8    | SNU23   | [216] LSM8   | SNU23   |
| [217] PRP3    | SNU66   | [218] PRP3    | SNU23   | [219] SNU66  | SNU23   |
| [220] RPN10   | PPH22   | [221] RPN5    | PRE4    | [222] RPN5   | PPH22   |
| [223] RPN5    | PUP3    | [224] RPN5    | PRE8    | [225] PRE4   | PUP3    |
| [226] PRE4    | PRE5    | [227] PUP3    | PRE5    | [228] LSM3   | EDC3    |
| [229] EDC3    | LSM4    | [230] EDC3    | LSM1    | [231] EDC3   | PAT1    |
| [232] RRP43   | RRP6    | [233] RRP43   | SKI7    | [234] RRP43  | RRP42   |
| [235] RRP6    | SKI7    | [236] RRP6    | RRP4    | [237] RRP6   | RRP42   |
| [238] SKI7    | RRP42   | [239] SKI7    | SRP1    | [240] RRP42  | SRP1    |
| [241] YNL132W | NOP1    | [242] UTP7    | SOF1    | [243] KRR1   | UTP22   |
| [244] SOF1    | UTP22   | [245] TIF5    | CKB2    | [246] SUI1   | CKB2    |
| [247] TIF34   | CKB2    | [248] SUA7    | CKB2    | [249] CTF8   | POL30   |
| [250] CTF18   | POL30   | [251] LSM3    | SMX2    | [252] LSM3   | PRP6    |
| [253] PHO86   | AQY1    | [254] PHO86   | TP03    | [255] ALG1   | AQY1    |
| [256] GPI8    | TP03    | [257] AQY1    | GPI2    | [258] AQY1   | TSC13   |
| [259] AQY1    | IFA38   | [260] AQY1    | GAS3    | [261] GPI2   | TP03    |
| [262] TSC13   | TP03    | [263] ERG25   | TP03    | [264] PHO86  | SLY41   |
| [265] YHR140W | SLY41   | [266] ELO1    | SLY41   | [267] ELO2   | SLY41   |
| [268] BOS1    | DSL1    | [269] SEC27   | DSL1    | [270] SEC22  | DSL1    |
| [271] DSL1    | SEC21   | [272] SAM3    | YHR140W | [273] SAM3   | TSC13   |
| [274] SAM3    | GAS3    | [275] ALG1    | GIT1    | [276] GIT1   | GPI8    |
| [277] GIT1    | YHR140W | [278] GIT1    | TSC13   | [279] GIT1   | IFA38   |
| [280] GIT1    | GSF2    | [281] GIT1    | ELO2    | [282] GIT1   | GAS3    |

|               |        |               |        |               |         |
|---------------|--------|---------------|--------|---------------|---------|
| [283] GIT1    | NSG1   | [284] GIT1    | FET3   | [285] TSC13   | FET3    |
| [286] GAS3    | FET3   | [287] NSG1    | FET3   | [288] TAF9    | SPT20   |
| [289] TAF1    | SPT20  | [290] TAF5    | SPT20  | [291] SPT20   | TAF6    |
| [292] GCN4    | ADR1   | [293] TAF9    | ADR1   | [294] NGG1    | ADR1    |
| [295] RNA14   | SWD2   | [296] RNA14   | YTH1   | [297] RNA14   | GLC7    |
| [298] RNA14   | PTI1   | [299] SWD2    | DBP4   | [300] SWD2    | PCF11   |
| [301] SWD2    | PAP1   | [302] SWD2    | YTH1   | [303] SWD2    | PTI1    |
| [304] SWD2    | FIP1   | [305] CFT1    | DBP4   | [306] DBP4    | PCF11   |
| [307] DBP4    | MPE1   | [308] DBP4    | YTH1   | [309] PCF11   | PFS2    |
| [310] PCF11   | YTH1   | [311] PCF11   | GLC7   | [312] PCF11   | REF2    |
| [313] PCF11   | PTI1   | [314] PCF11   | FIP1   | [315] PFS2    | GLC7    |
| [316] GLC7    | PTI1   | [317] YSH1    | PTI1   | [318] REF2    | FIP1    |
| [319] GIN4    | HSP26  | [320] BNI5    | SHS1   | [321] BNI5    | HSP26   |
| [322] CDC3    | HSP26  | [323] SPT7    | ADR1   | [324] SIN4    | SRB2    |
| [325] ROX3    | SRB6   | [326] ROX3    | MED2   | [327] RGR1    | SRB2    |
| [328] DCP2    | RPS23A | [329] DCP2    | RPS28B | [330] EDC3    | RPS23A  |
| [331] RPS23A  | RPS28B | [332] RRP43   | MTR3   | [333] RRP6    | MTR3    |
| [334] SKI7    | MTR3   | [335] RRP4    | MTR3   | [336] MTR3    | SRP1    |
| [337] RPN10   | RPT5   | [338] RPT2    | RPT4   | [339] RPT2    | RPT6    |
| [340] RPT2    | RPN8   | [341] RPT2    | RPT5   | [342] RPT2    | RPN9    |
| [343] RPT2    | RPN3   | [344] RPT4    | PRE1   | [345] RPT4    | RPN8    |
| [346] RPT4    | RPN9   | [347] RPT4    | RAD23  | [348] RPT4    | RPN3    |
| [349] RPT4    | RPN11  | [350] RPT6    | RPN8   | [351] RPT6    | RPT5    |
| [352] RPT6    | RPN9   | [353] RPT6    | RPN3   | [354] RPN8    | RPT5    |
| [355] RPN8    | RPN3   | [356] RPT5    | UBP6   | [357] RPT5    | RPN9    |
| [358] RPT5    | RPN3   | [359] RPT5    | RPN11  | [360] RPN9    | RPN3    |
| [361] SSN2    | GAL11  | [362] SRB6    | SFL1   | [363] MED2    | SFL1    |
| [364] SFL1    | GAL11  | [365] SFL1    | MED7   | [366] VID21   | HTZ1    |
| [367] VID21   | ARP4   | [368] VID21   | ACT1   | [369] VID21   | TRA1    |
| [370] VID21   | RVB2   | [371] SWC4    | SAP185 | [372] HTZ1    | ESA1    |
| [373] HTZ1    | SAP185 | [374] ACT1    | TRA1   | [375] TRA1    | RVB2    |
| [376] ESA1    | RVB2   | [377] SAP185  | RVB2   | [378] SAP185  | YAF9    |
| [379] RVB2    | EPL1   | [380] RPB7    | IKI3   | [381] RPB5    | TFG1    |
| [382] RPB9    | IKI3   | [383] RPB2    | TFG1   | [384] TFG1    | RPB4    |
| [385] TFG1    | IKI3   | [386] TFG1    | RPB1   | [387] RPB3    | RPB1    |
| [388] RPN10   | PRE10  | [389] RPN10   | POC4   | [390] PRE6    | PRE10   |
| [391] PRE6    | PRE9   | [392] PRE6    | PRE5   | [393] PRE10   | PRE9    |
| [394] PRE10   | PRE8   | [395] PRE1    | POC4   | [396] PPH22   | POC4    |
| [397] PRE9    | PRE5   | [398] POC4    | PRE2   | [399] SPP381  | LSM5    |
| [400] BRR2    | LSM5   | [401] PRP31   | LSM5   | [402] PRP8    | LSM5    |
| [403] PRP3    | LSM5   | [404] SNU23   | LSM5   | [405] YHR140W | YHL042W |
| [406] YHR140W | SPC1   | [407] YHL042W | EL01   | [408] GPI8    | SPC1    |
| [409] TSC13   | SPC1   | [410] AGP1    | SPC1   | [411] YPL264C | SPC1    |
| [412] SPC1    | GAS3   | [413] RPB5    | RPC17  | [414] RPB5    | RPC2    |



|       |       |       |       |        |       |       |        |       |
|-------|-------|-------|-------|--------|-------|-------|--------|-------|
| [415] | RPC17 | RPC2  | [416] | RPC2   | RPB8  | [417] | RPB2   | RPB8  |
| [418] | RPB4  | RPB8  | [419] | RPB8   | IKI3  | [420] | SMB1   | DIB1  |
| [421] | DIB1  | SMD1  | [422] | PH086  | PFA4  | [423] | ALG1   | PFA4  |
| [424] | GPI2  | FET3  | [425] | SUR2   | FET3  | [426] | ERG25  | FET3  |
| [427] | EL02  | PFA4  | [428] | PFA4   | PH088 | [429] | PFA4   | YET1  |
| [430] | SWD2  | SHG1  | [431] | SWD2   | SDC1  | [432] | SET3   | CPR1  |
| [433] | ZDS1  | CPR1  | [434] | ZDS1   | HST1  | [435] | ARC18  | MY05  |
| [436] | ARC15 | MY05  | [437] | ARC35  | MY05  | [438] | CDC28  | ORC5  |
| [439] | CDC28 | ORC4  | [440] | CDC28  | ORC3  | [441] | RRP43  | RRP40 |
| [442] | RRP6  | RRP40 | [443] | RRP4   | RRP40 | [444] | RRP40  | CSL4  |
| [445] | RRP40 | SRP1  | [446] | MUD1   | SRP1  | [447] | PRP40  | SRP1  |
| [448] | SMX2  | SRP1  | [449] | YHC1   | SRP1  | [450] | SNU71  | SRP1  |
| [451] | LUC7  | SRP1  | [452] | CDC27  | APC9  | [453] | APC4   | CDC16 |
| [454] | APC1  | APC9  | [455] | APC9   | CDC26 | [456] | APC9   | DOC1  |
| [457] | DNL4  | ERB1  | [458] | DNL4   | GLC7  | [459] | DNL4   | NOP6  |
| [460] | RPF2  | GLC7  | [461] | CIC1   | NOP7  | [462] | CIC1   | TIF6  |
| [463] | NOP2  | NOP15 | [464] | NOP2   | GLC7  | [465] | NOP15  | GLC7  |
| [466] | NOP15 | NOP6  | [467] | GLC7   | NOP6  | [468] | GLC7   | TIF6  |
| [469] | SIN4  | SRB8  | [470] | RGR1   | SRB8  | [471] | SRB8   | SRB2  |
| [472] | MAK21 | NOP6  | [473] | MAK21  | TIF6  | [474] | MAK21  | CKA1  |
| [475] | RPF2  | NOP4  | [476] | RPF2   | CKA1  | [477] | CIC1   | HAS1  |
| [478] | HAS1  | YTM1  | [479] | YTM1   | SSF1  | [480] | YTM1   | CKA1  |
| [481] | NOP15 | SSF1  | [482] | NOP15  | CKA1  | [483] | NOP4   | NOP6  |
| [484] | NOP4  | TIF6  | [485] | NOP6   | SSF1  | [486] | NOP6   | CKA1  |
| [487] | OST3  | PKC1  | [488] | OST4   | PKC1  | [489] | OST5   | PKC1  |
| [490] | PKC1  | OST2  | [491] | STT3   | SWP1  | [492] | SMX3   | SMX2  |
| [493] | SMX3  | BRR2  | [494] | SMX3   | PRP8  | [495] | SMX3   | LSM8  |
| [496] | SMX3  | SNU66 | [497] | SNU114 | DIB1  | [498] | PRP8   | DIB1  |
| [499] | LSM8  | DIB1  | [500] | SNU66  | DIB1  | [501] | DIB1   | PRP4  |
| [502] | RPN10 | RPN1  | [503] | RPN5   | NAS6  | [504] | RPN12  | NAS6  |
| [505] | RPN12 | RPN1  | [506] | PRE1   | NAS6  | [507] | RPN8   | ATG12 |
| [508] | RPN8  | NAS6  | [509] | RPN8   | RPN1  | [510] | ATG12  | RPN9  |
| [511] | ATG12 | NAS6  | [512] | RPN9   | NAS6  | [513] | RPN9   | RPN1  |
| [514] | RPN11 | NAS6  | [515] | RPN11  | RPN1  | [516] | NAS6   | RPN1  |
| [517] | NAS6  | RPN6  | [518] | RPN1   | RPN6  | [519] | SNU114 | LSM4  |
| [520] | PRP31 | LSM4  | [521] | PRP8   | LSM4  | [522] | PRP3   | LSM4  |
| [523] | LSM4  | PRP4  | [524] | DHH1   | DCP2  | [525] | DHH1   | LSM8  |
| [526] | TAF9  | TAF14 | [527] | TAF12  | TAF14 | [528] | TAF1   | TAF14 |
| [529] | TAF5  | TAF14 | [530] | TAF14  | TAF13 | [531] | TAF14  | TAF6  |
| [532] | RPN10 | PUP1  | [533] | RPN5   | PUP1  | [534] | PRE1   | PUP1  |
| [535] | PUP1  | SCL1  | [536] | PUP1   | PRE5  | [537] | IFA38  | SHR3  |
| [538] | EMP24 | AGP1  | [539] | EMP24  | AVT4  | [540] | EMP24  | COS8  |
| [541] | EMP24 | YPC1  | [542] | GSF2   | SHR3  | [543] | SEC28  | SEC21 |
| [544] | SEC28 | RET3  | [545] | SEC28  | SEC26 | [546] | SEC22  | BET1  |

|                     |                       |                     |
|---------------------|-----------------------|---------------------|
| [547] SEC21 RET3    | [548] SEC21 SEC26     | [549] RET3 SEC26    |
| [550] CEF1 YJU2     | [551] SNT309 SNU114   | [552] SNT309 PRP45  |
| [553] SNU114 PRP19  | [554] SNU114 SYF1     | [555] RPF2 IPI3     |
| [556] ARX1 RIX1     | [557] ARX1 NOG1       | [558] ARX1 IPI3     |
| [559] ARX1 TIF6     | [560] RIX1 NOG1       | [561] NOG1 IPI3     |
| [562] NSA2 IPI3     | [563] RLP7 ARX1       | [564] RLP7 RIX1     |
| [565] RLP7 NOG1     | [566] ARX1 ERB1       | [567] SDA1 ERB1     |
| [568] ERB1 RIX1     | [569] ERB1 BUD20      | [570] MAK21 NUG1    |
| [571] MAK21 NOG1    | [572] HAS1 NUG1       | [573] HAS1 NOG1     |
| [574] NUG1 NOG1     | [575] NUG1 SSF1       | [576] NUG1 TIF6     |
| [577] NOG1 NOP7     | [578] ALG1 MST27      | [579] MST27 EL02    |
| [580] TP03 CAN1     | [581] PH086 SEC63     | [582] SEC63 STE24   |
| [583] SEC63 SHR3    | [584] STE24 SHR3      | [585] PH086 MST27   |
| [586] BSD2 SPC1     | [587] MST27 IFA38     | [588] MST27 AGP1    |
| [589] MST27 LAC1    | [590] MST27 SPC1      | [591] MST27 GAS3    |
| [592] MST27 EL03    | [593] LAC1 PH088      | [594] PH086 YIL171W |
| [595] GPI2 YIL171W  | [596] YHL042W YIL171W | [597] CAN1 YIL171W  |
| [598] SPC1 YIL171W  | [599] EL03 YIL171W    | [600] WBP1 AGP1     |
| [601] GPI2 PMP3     | [602] MED2 GAL4       | [603] MED2 ADA2     |
| [604] GAL11 ADA2    | [605] MED8 GAL4       | [606] MED8 ADA2     |
| [607] SRB5 ADA2     | [608] GAL4 MED7       | [609] RLP7 IPI3     |
| [610] YNL132W UTP20 | [611] NOP1 UTP20      | [612] RPB5 RPC3     |
| [613] RPC3 RPB8     | [614] RPN10 HSM3      | [615] RPN5 HSM3     |
| [616] RPT4 HSM3     | [617] PRE1 HSM3       | [618] UBP6 HSM3     |
| [619] HSM3 RAD23    | [620] HSM3 RPN11      | [621] HSM3 RPT1     |
| [622] RPA12 HHF1    | [623] RPA1 HHF1       | [624] HHF1 RPB10    |
| [625] RPB10 RPC19   | [626] SWD2 CLP1       | [627] DBP4 CLP1     |
| [628] CLP1 PAP1     | [629] CLP1 PFS2       | [630] CLP1 CFT2     |
| [631] CLP1 MPE1     | [632] CLP1 YTH1       | [633] CLP1 GLC7     |
| [634] CLP1 PTA1     | [635] CLP1 REF2       | [636] CLP1 PTI1     |
| [637] CLP1 FIP1     | [638] SPT5 CKA1       | [639] PAF1 CKA1     |
| [640] CDC73 CKA1    | [641] LE01 CKA1       | [642] SPT5 RPT1     |
| [643] RTF1 RPT1     | [644] CDC73 RPT1      | [645] CTR9 UTP22    |
| [646] SPT16 UTP22   | [647] TAF12 TAF11     | [648] TAF11 TAF6    |
| [649] ADR1 TAF11    | [650] ADR1 TAF13      | [651] TAF11 ADA2    |
| [652] RPN10 BUD32   | [653] RPT6 RPN7       | [654] RPN12 BUD32   |
| [655] PRE1 BUD32    | [656] YGL004C BUD32   | [657] ATG12 BUD32   |
| [658] BUD32 RPN7    | [659] BUD32 RPN3      | [660] BUD32 RPN11   |
| [661] RPN7 RPN1     | [662] RPN3 RPN1       | [663] PRP42 SRP1    |
| [664] PH086 ALG11   | [665] AGP1 ALG11      | [666] ERG25 ALG11   |
| [667] LAC1 ALG11    | [668] SPC1 ALG11      | [669] GAS3 ALG11    |
| [670] SAM3 GPI2     | [671] SAM3 AVT4       | [672] SAM3 ERG25    |
| [673] SAM3 EL01     | [674] ERG11 ALG1      | [675] ERG11 YHR140W |
| [676] ERG11 TSC13   | [677] ERG11 IFA38     | [678] ERG11 ERG25   |

|                    |                     |                     |
|--------------------|---------------------|---------------------|
| [679] ERG11 EL01   | [680] ERG11 GAS3    | [681] ERG11 PH088   |
| [682] MAK21 DBP10  | [683] HAS1 NIP7     | [684] HAS1 DBP10    |
| [685] ERB1 NIP7    | [686] ERB1 DBP10    | [687] NIP7 NOP7     |
| [688] NIP7 DBP10   | [689] NIP7 TIF6     | [690] NIP7 CKA1     |
| [691] RPN10 RPN2   | [692] RPT2 RPN2     | [693] RPT6 RPN2     |
| [694] RPN12 RPN2   | [695] RPN8 RPN2     | [696] RPN2 RPT5     |
| [697] RPN2 UBP6    | [698] RPN2 RPN9     | [699] RPN2 HSM3     |
| [700] RPN2 RPN11   | [701] RPN2 RPN3     | [702] RPN2 RPN6     |
| [703] RPN2 RPT1    | [704] RPF2 YCR072C  | [705] RLP7 YCR072C  |
| [706] RLP7 NOP7    | [707] ERB1 YCR072C  | [708] ERB1 IPI3     |
| [709] RIX1 NOP7    | [710] NOP15 YCR072C | [711] YCR072C NOG1  |
| [712] YCR072C NOP7 | [713] YCR072C TIF6  | [714] NOP7 NSA2     |
| [715] NOP7 IPI3    | [716] ENP1 LYS14    | [717] YNL132W LYS14 |
| [718] YNL132W UTP6 | [719] UTP7 LYS14    | [720] LYS14 UTP22   |
| [721] SWC7 ARP4    | [722] SWC7 ACT1     | [723] SWC7 EPL1     |
| [724] SWR1 EPL1    | [725] PRP40 PRP39   | [726] SMX2 PRP39    |
| [727] SNU56 PRP39  | [728] PRP39 CBC1    | [729] PRP39 CBC2    |
| [730] PRP39 PRP42  | [731] RPB7 RPC5     | [732] RPB9 RPC5     |
| [733] RPC5 RPB1    | [734] GCN4 MED7     | [735] SRB7 SRB4     |
| [736] SRB7 TAF5    | [737] SRB7 SRB2     | [738] SRB7 TAF6     |
| [739] NGG1 MED7    | [740] SRB4 TAF5     | [741] SRB4 TAF6     |
| [742] TAF5 MED7    | [743] SRB2 TAF6     | [744] NOT2 NOT3     |
| [745] NOT2 CAF130  | [746] NOT3 CCR4     | [747] NOT5 SSN2     |
| [748] NOT5 POP2    | [749] SSN2 NOT4     | [750] SSN2 NOT3     |
| [751] SSN2 CAF130  | [752] NOT2 POP2     | [753] BOS1 SAM1     |
| [754] SAM1 SEC22   | [755] SAM1 SEC21    | [756] PRE6 PRE4     |
| [757] PRE6 PUP3    | [758] PRE4 PRE9     | [759] PRE9 PUP3     |
| [760] SMX3 SMD1    | [761] PRP31 CUS1    | [762] PRP6 CUS1     |
| [763] SMD1 CUS1    | [764] SLA1 GCD7     | [765] GTS1 ABP1     |
| [766] ABP1 GCD7    | [767] RVS167 GCD7   | [768] GCD7 YSC84    |
| [769] RSE1 SMD2    | [770] RSE1 SMB1     | [771] RSE1 SNU71    |
| [772] RSE1 SMD3    | [773] SMD2 SMB1     | [774] SMD2 CUS1     |
| [775] CBC1 SMB1    | [776] SMB1 SNU71    | [777] SNU71 CUS1    |
| [778] LUC7 CUS1    | [779] CTR9 FKH1     | [780] SPT16 FKH1    |
| [781] GPI8 PMT7    | [782] PMT7 GPI2     | [783] PMT7 GAS3     |
| [784] TSC13 CH01   | [785] IFA38 CH01    | [786] STE24 CH01    |
| [787] CH01 EL01    | [788] CH01 EL02     | [789] HCR1 CKB2     |
| [790] GCN4 GAL4    | [791] SRB4 SPT15    | [792] CIC1 BRX1     |
| [793] HAS1 BRX1    | [794] YTM1 BRX1     | [795] NOP7 BRX1     |
| [796] BRX1 SSF1    | [797] BRX1 TIF6     | [798] BRX1 CKA1     |
| [799] PRE10 PUP3   | [800] NUP100 PRE8   | [801] KAP95 PRE8    |
| [802] PRE8 NUP2    | [803] PRE8 SRP1     | [804] PSE1 NUP2     |
| [805] RPT2 RPN7    | [806] RPT2 ECM29    | [807] RPT6 ECM29    |
| [808] PRE1 ECM29   | [809] YGL004C ECM29 | [810] RPN8 RPN7     |

|       |         |       |       |         |         |       |         |         |
|-------|---------|-------|-------|---------|---------|-------|---------|---------|
| [811] | RPN9    | RPN7  | [812] | RPN9    | ECM29   | [813] | RPN7    | ECM29   |
| [814] | RPN3    | ECM29 | [815] | RPT3    | ECM29   | [816] | AQY1    | SHR3    |
| [817] | ALG1    | SHR3  | [818] | TP01    | AGP1    | [819] | PH086   | GAS2    |
| [820] | ALG1    | GAS2  | [821] | ALG1    | VAP1    | [822] | GAS2    | GPI8    |
| [823] | GAS2    | IFA38 | [824] | GAS2    | EMP24   | [825] | GAS2    | GSF2    |
| [826] | GAS2    | EL02  | [827] | GAS2    | PH088   | [828] | GAS2    | EL03    |
| [829] | GAS2    | YET1  | [830] | VAP1    | GPI8    | [831] | VAP1    | YHR140W |
| [832] | VAP1    | GPI2  | [833] | VAP1    | IFA38   | [834] | VAP1    | AGP1    |
| [835] | VAP1    | ERG25 | [836] | VAP1    | CAN1    | [837] | VAP1    | GAS3    |
| [838] | VAP1    | PH088 | [839] | VAP1    | NSG1    | [840] | AGP1    | CAN1    |
| [841] | RPF2    | URB1  | [842] | RPF2    | MAK5    | [843] | MAK21   | URB1    |
| [844] | CIC1    | URB1  | [845] | HAS1    | URB1    | [846] | ERB1    | URB1    |
| [847] | URB1    | YTM1  | [848] | URB1    | NOP7    | [849] | MAK5    | NOP7    |
| [850] | SPP381  | SMX2  | [851] | SPP381  | SMD1    | [852] | PRP11   | SMD1    |
| [853] | RSE1    | PRP11 | [854] | RSE1    | PRP21   | [855] | SPP381  | CDC48   |
| [856] | SMX2    | CDC48 | [857] | PRP9    | CDC48   | [858] | ROX3    | RPB1    |
| [859] | MED2    | RPB1  | [860] | RGR1    | RPB1    | [861] | MED7    | RPB1    |
| [862] | RPT4    | RPN1  | [863] | RPT5    | RPN1    | [864] | UBP6    | RPN1    |
| [865] | UTP18   | SRB4  | [866] | CKA2    | SRB4    | [867] | SRB4    | CKB1    |
| [868] | SRB4    | CKA1  | [869] | CIC1    | NOG1    | [870] | YTM1    | NOG1    |
| [871] | NOP15   | MAK5  | [872] | MAK5    | TIF6    | [873] | MAK5    | CKA1    |
| [874] | LSM3    | LEU2  | [875] | KEM1    | LEU2    | [876] | LEU2    | LSM4    |
| [877] | NOG2    | RLP7  | [878] | NOG2    | RIX1    | [879] | NOG2    | NOP15   |
| [880] | NOG2    | NOG1  | [881] | SMB1    | SNU66   | [882] | ENP1    | ASC1    |
| [883] | UTP7    | CBF5  | [884] | UTP7    | ASC1    | [885] | PWP2    | ASC1    |
| [886] | CBF5    | ASC1  | [887] | NOP1    | ASC1    | [888] | HAS1    | NOC2    |
| [889] | NOP7    | NOC2  | [890] | YTM1    | NOC2    | [891] | NOP15   | NOC2    |
| [892] | NOC2    | TIF6  | [893] | NOC2    | CKA1    | [894] | AVT4    | SPC1    |
| [895] | COS8    | SPC1  | [896] | SPC1    | YPC1    | [897] | RPN1    | ECM29   |
| [898] | RPN5    | GFA1  | [899] | RPT6    | GFA1    | [900] | RPN12   | GFA1    |
| [901] | PRE1    | GFA1  | [902] | YGL004C | GFA1    | [903] | GFA1    | RPN9    |
| [904] | GFA1    | RPN7  | [905] | GFA1    | RPN11   | [906] | GFA1    | RPN3    |
| [907] | GFA1    | RPT3  | [908] | GFA1    | RPN6    | [909] | GFA1    | RPT1    |
| [910] | WBP1    | TSC13 | [911] | WBP1    | YPL264C | [912] | WBP1    | YPC1    |
| [913] | PH086   | SWP1  | [914] | ALG1    | SWP1    | [915] | YHR140W | SWP1    |
| [916] | GPI8    | SWP1  | [917] | GPI2    | SWP1    | [918] | SUR2    | TSC13   |
| [919] | SUR2    | YPC1  | [920] | TP01    | YPC1    | [921] | TSC13   | SWP1    |
| [922] | YPL264C | SWP1  | [923] | YPL264C | YPC1    | [924] | ERG25   | SWP1    |
| [925] | GAS3    | SWP1  | [926] | SUR2    | AVT4    | [927] | SUR2    | COS8    |
| [928] | GSF2    | EL01  |       |         |         |       |         |         |

### 3. PPI predictions based on the detected complexes derived from NDComplex (N)

|     |       |       |     |       |         |     |       |      |
|-----|-------|-------|-----|-------|---------|-----|-------|------|
| [1] | RPN5  | RAD23 | [2] | RPN12 | YGL004C | [3] | RPN12 | UBP6 |
| [4] | RPN12 | ATG12 | [5] | PRE1  | YGL004C | [6] | PRE1  | UBP6 |

|               |         |             |         |             |         |
|---------------|---------|-------------|---------|-------------|---------|
| [7] PRE1      | ATG12   | [8] YGL004C | UBP6    | [9] YGL004C | ATG12   |
| [10] YGL004C  | RAD23   | [11] UBP6   | ATG12   | [12] UBP6   | RAD23   |
| [13] UBP6     | RPN7    | [14] ATG12  | RAD23   | [15] RAD23  | RPN7    |
| [16] RAD23    | RPN11   | [17] RPN7   | RPN11   | [18] LSM3   | SMD3    |
| [19] DCP1     | PRP24   | [20] DCP1   | SMD3    | [21] DCP1   | PAT1    |
| [22] LSM7     | SMD3    | [23] PRP24  | LSM4    | [24] PRP24  | LSM1    |
| [25] PRP24    | SMD3    | [26] PRP24  | PAT1    | [27] LSM1   | SMD3    |
| [28] SMD3     | PAT1    | [29] PH086  | ALG1    | [30] PH086  | TP01    |
| [31] PH086    | IFA38   | [32] PH086  | GSF2    | [33] ALG1   | GSF2    |
| [34] GPI8     | TP01    | [35] GPI8   | EMP24   | [36] GPI8   | YPL264C |
| [37] GPI8     | ERG25   | [38] GPI2   | TP01    | [39] GPI2   | TSC13   |
| [40] GPI2     | EMP24   | [41] TP01   | TSC13   | [42] TP01   | EMP24   |
| [43] TP01     | YPL264C | [44] IFA38  | EL02    | [45] IFA38  | PH088   |
| [46] IFA38    | EL03    | [47] IFA38  | YET1    | [48] EMP24  | YPL264C |
| [49] YPL264C  | GAS3    | [50] GSF2   | EL02    | [51] GSF2   | PH088   |
| [52] GSF2     | YET1    | [53] EL02   | PH088   | [54] EL02   | EL03    |
| [55] EL02     | YET1    | [56] PH088  | EL03    | [57] PH088  | YET1    |
| [58] EL03     | YET1    | [59] SUI1   | SUA7    | [60] TIF34  | HCR1    |
| [61] SUA7     | HCR1    | [62] HCR1   | NIP1    | [63] NOT2   | CAF16   |
| [64] SSN3     | CAF40   | [65] SSN3   | CAF16   | [66] CAF40  | CAF16   |
| [67] CAF16    | NOT1    | [68] PH086  | STE24   | [69] PH086  | EL01    |
| [70] ALG1     | STE24   | [71] ALG1   | AVT4    | [72] ALG1   | EL01    |
| [73] ALG1     | YPC1    | [74] BSD2   | YHR140W | [75] BSD2   | GPI8    |
| [76] BSD2     | AVT4    | [77] BSD2   | ERG25   | [78] BSD2   | COS8    |
| [79] GPI8     | AVT4    | [80] GPI8   | COS8    | [81] TSC13  | YPC1    |
| [82] IFA38    | STE24   | [83] STE24  | EL02    | [84] STE24  | PH088   |
| [85] STE24    | EL03    | [86] STE24  | YET1    | [87] AVT4   | COS8    |
| [88] AVT4     | GAS3    | [89] ERG25  | COS8    | [90] ERG25  | EL01    |
| [91] COS8     | GAS3    | [92] EL01   | YPC1    | [93] GAS3   | YPC1    |
| [94] BOS1     | GPT2    | [95] SEC22  | GPT2    | [96] SEC21  | GPT2    |
| [97] RET1     | GPT2    | [98] MUD1   | SMD2    | [99] MUD1   | LUC7    |
| [100] PRP40   | SNU56   | [101] PRP40 | SMD2    | [102] PRP40 | CBC2    |
| [103] PRP40   | PRP42   | [104] SMX2  | NAM8    | [105] SMX2  | CBC2    |
| [106] SMX2    | PRP42   | [107] SNU56 | SMD2    | [108] SNU56 | CBC1    |
| [109] SNU56   | PRP42   | [110] SMD2  | SNP1    | [111] SMD2  | PRP42   |
| [112] YHC1    | CBC2    | [113] CBC2  | PRP42   | [114] LSM3  | DCP2    |
| [115] KEM1    | DCP1    | [116] KEM1  | LSM6    | [117] KEM1  | LSM7    |
| [118] KEM1    | PRP24   | [119] KEM1  | LSM1    | [120] KEM1  | LSM5    |
| [121] DCP2    | LSM6    | [122] DCP2  | LSM7    | [123] DCP2  | PRP24   |
| [124] DCP2    | LSM5    | [125] DCP2  | SMD3    | [126] GCN4  | SPT7    |
| [127] GCN4    | TAF10   | [128] TAF9  | SPT15   | [129] SPT7  | TAF1    |
| [130] SPT7    | SPT15   | [131] NGG1  | TAF10   | [132] SPT15 | TAF10   |
| [133] YHR140W | AGP1    | [134] TSC13 | AGP1    | [135] TSC13 | SHR3    |
| [136] AGP1    | AVT4    | [137] AGP1  | COS8    | [138] AGP1  | YPC1    |

|                     |                    |                    |
|---------------------|--------------------|--------------------|
| [139] EL02 SHR3     | [140] SHR3 PH088   | [141] SHR3 EL03    |
| [142] SHR3 YET1     | [143] BSD2 EMP24   | [144] BSD2 YPL264C |
| [145] BSD2 CAN1     | [146] GPI8 CAN1    | [147] GPI2 NSG1    |
| [148] TSC13 CAN1    | [149] EMP24 CAN1   | [150] EMP24 NSG1   |
| [151] YPL264C CAN1  | [152] YPL264C NSG1 | [153] ERG25 CAN1   |
| [154] ERG25 NSG1    | [155] CAN1 GAS3    | [156] GCN4 TAF12   |
| [157] GCN4 TAF13    | [158] TAF9 TAF12   | [159] TAF12 ADA2   |
| [160] SPT15 TAF13   | [161] TAF13 ADA2   | [162] WBP1 YHR140W |
| [163] WBP1 GPI8     | [164] WBP1 ERG25   | [165] WBP1 GAS3    |
| [166] ALG1 SUR2     | [167] SUR2 ERG25   | [168] SUR2 GAS3    |
| [169] PH086 CSG2    | [170] ALG1 CSG2    | [171] GPI8 CSG2    |
| [172] CSG2 COS8     | [173] COS8 CAN1    | [174] TAF5 GCN5    |
| [175] TAF5 UBP8     | [176] UBP8 TAF10   | [177] UBP8 TAF6    |
| [178] UBP8 ADA2     | [179] ALG1 AGP1    | [180] ALG1 LAC1    |
| [181] BSD2 AGP1     | [182] YHR140W LAC1 | [183] GPI8 AGP1    |
| [184] AGP1 YPL264C  | [185] GSF2 LAC1    | [186] LAC1 EL02    |
| [187] LAC1 NSG1     | [188] NSG1 YET1    | [189] PH086 BAP3   |
| [190] GPI2 BAP3     | [191] SMX2 BRR2    | [192] SMX2 PRP8    |
| [193] SMX2 LSM8     | [194] SNU114 PRP6  | [195] SNU114 SMB1  |
| [196] SNU114 PRP3   | [197] PRP6 SMB1    | [198] PRP8 SMD1    |
| [199] LSM8 SMD1     | [200] SMB1 PRP3    | [201] SMB1 PRP4    |
| [202] PRP3 SMD1     | [203] SMD1 PRP4    | [204] RSE1 PRP43   |
| [205] RSE1 SNU114   | [206] PRP8 PRP45   | [207] SPP381 PRP8  |
| [208] SPP381 LSM8   | [209] SPP381 SMD3  | [210] SNU114 SNU66 |
| [211] SNU114 SNU23  | [212] PRP31 SNU23  | [213] PRP6 SNU66   |
| [214] PRP6 SNU23    | [215] PRP8 SNU23   | [216] LSM8 SNU23   |
| [217] PRP3 SNU66    | [218] PRP3 SNU23   | [219] SNU66 SNU23  |
| [220] RPN10 PPH22   | [221] RPN5 PRE4    | [222] RPN5 PPH22   |
| [223] RPN5 PUP3     | [224] RPN5 PRE8    | [225] PRE4 PUP3    |
| [226] PRE4 PRE5     | [227] PUP3 PRE5    | [228] LSM3 EDC3    |
| [229] EDC3 LSM4     | [230] EDC3 LSM1    | [231] EDC3 PAT1    |
| [232] RRP43 RRP6    | [233] RRP43 SKI7   | [234] RRP43 RRP42  |
| [235] RRP6 SKI7     | [236] RRP6 RRP4    | [237] RRP6 RRP42   |
| [238] SKI7 RRP42    | [239] SKI7 SRP1    | [240] RRP42 SRP1   |
| [241] YNL132W NOP1  | [242] UTP7 SOF1    | [243] KRR1 UTP22   |
| [244] SOF1 UTP22    | [245] TIF5 CKB2    | [246] SUI1 CKB2    |
| [247] TIF34 CKB2    | [248] SUA7 CKB2    | [249] CTF8 POL30   |
| [250] CTF18 POL30   | [251] LSM3 SMX2    | [252] LSM3 PRP6    |
| [253] PH086 AQY1    | [254] PH086 TP03   | [255] ALG1 AQY1    |
| [256] GPI8 TP03     | [257] AQY1 GPI2    | [258] AQY1 TSC13   |
| [259] AQY1 IFA38    | [260] AQY1 GAS3    | [261] GPI2 TP03    |
| [262] TSC13 TP03    | [263] ERG25 TP03   | [264] PH086 SLY41  |
| [265] YHR140W SLY41 | [266] EL01 SLY41   | [267] EL02 SLY41   |
| [268] BOS1 DSL1     | [269] SEC27 DSL1   | [270] SEC22 DSL1   |

|       |        |         |       |        |         |       |        |        |
|-------|--------|---------|-------|--------|---------|-------|--------|--------|
| [271] | DSL1   | SEC21   | [272] | SAM3   | YHR140W | [273] | SAM3   | TSC13  |
| [274] | SAM3   | GAS3    | [275] | ALG1   | GIT1    | [276] | GIT1   | GPI8   |
| [277] | GIT1   | YHR140W | [278] | GIT1   | TSC13   | [279] | GIT1   | IFA38  |
| [280] | GIT1   | GSF2    | [281] | GIT1   | EL02    | [282] | GIT1   | GAS3   |
| [283] | GIT1   | NSG1    | [284] | GIT1   | FET3    | [285] | TSC13  | FET3   |
| [286] | GAS3   | FET3    | [287] | NSG1   | FET3    | [288] | TAF9   | SPT20  |
| [289] | TAF1   | SPT20   | [290] | TAF5   | SPT20   | [291] | SPT20  | TAF6   |
| [292] | GCN4   | ADR1    | [293] | TAF9   | ADR1    | [294] | NGG1   | ADR1   |
| [295] | RNA14  | SWD2    | [296] | RNA14  | YTH1    | [297] | RNA14  | GLC7   |
| [298] | RNA14  | PTI1    | [299] | SWD2   | DBP4    | [300] | SWD2   | PCF11  |
| [301] | SWD2   | PAP1    | [302] | SWD2   | YTH1    | [303] | SWD2   | PTI1   |
| [304] | SWD2   | FIP1    | [305] | CFT1   | DBP4    | [306] | DBP4   | PCF11  |
| [307] | DBP4   | MPE1    | [308] | DBP4   | YTH1    | [309] | PCF11  | PFS2   |
| [310] | PCF11  | YTH1    | [311] | PCF11  | GLC7    | [312] | PCF11  | REF2   |
| [313] | PCF11  | PTI1    | [314] | PCF11  | FIP1    | [315] | PFS2   | GLC7   |
| [316] | GLC7   | PTI1    | [317] | YSH1   | PTI1    | [318] | REF2   | FIP1   |
| [319] | GIN4   | HSP26   | [320] | BNI5   | SHS1    | [321] | BNI5   | HSP26  |
| [322] | CDC3   | HSP26   | [323] | SPT7   | ADR1    | [324] | SIN4   | SRB2   |
| [325] | ROX3   | SRB6    | [326] | ROX3   | MED2    | [327] | RGR1   | SRB2   |
| [328] | DCP2   | RPS23A  | [329] | DCP2   | RPS28B  | [330] | EDC3   | RPS23A |
| [331] | RPS23A | RPS28B  | [332] | RRP43  | MTR3    | [333] | RRP6   | MTR3   |
| [334] | SKI7   | MTR3    | [335] | RRP4   | MTR3    | [336] | MTR3   | SRP1   |
| [337] | RPN10  | RPT5    | [338] | RPT2   | RPT4    | [339] | RPT2   | RPT6   |
| [340] | RPT2   | RPN8    | [341] | RPT2   | RPT5    | [342] | RPT2   | RPN9   |
| [343] | RPT2   | RPN3    | [344] | RPT4   | PRE1    | [345] | RPT4   | RPN8   |
| [346] | RPT4   | RPN9    | [347] | RPT4   | RAD23   | [348] | RPT4   | RPN3   |
| [349] | RPT4   | RPN11   | [350] | RPT6   | RPN8    | [351] | RPT6   | RPT5   |
| [352] | RPT6   | RPN9    | [353] | RPT6   | RPN3    | [354] | RPN8   | RPT5   |
| [355] | RPN8   | RPN3    | [356] | RPT5   | UBP6    | [357] | RPT5   | RPN9   |
| [358] | RPT5   | RPN3    | [359] | RPT5   | RPN11   | [360] | RPN9   | RPN3   |
| [361] | SSN2   | GAL11   | [362] | SRB6   | SFL1    | [363] | MED2   | SFL1   |
| [364] | SFL1   | GAL11   | [365] | SFL1   | MED7    | [366] | VID21  | HTZ1   |
| [367] | VID21  | ARP4    | [368] | VID21  | ACT1    | [369] | VID21  | TRA1   |
| [370] | VID21  | RVB2    | [371] | SWC4   | SAP185  | [372] | HTZ1   | ESA1   |
| [373] | HTZ1   | SAP185  | [374] | ACT1   | TRA1    | [375] | TRA1   | RVB2   |
| [376] | ESA1   | RVB2    | [377] | SAP185 | RVB2    | [378] | SAP185 | YAF9   |
| [379] | RVB2   | EPL1    | [380] | RPB7   | IKI3    | [381] | RPB5   | TFG1   |
| [382] | RPB9   | IKI3    | [383] | RPB2   | TFG1    | [384] | TFG1   | RPB4   |
| [385] | TFG1   | IKI3    | [386] | TFG1   | RPB1    | [387] | RPB3   | RPB1   |
| [388] | RPN10  | PRE10   | [389] | RPN10  | POC4    | [390] | PRE6   | PRE10  |
| [391] | PRE6   | PRE9    | [392] | PRE6   | PRE5    | [393] | PRE10  | PRE9   |
| [394] | PRE10  | PRE8    | [395] | PRE1   | POC4    | [396] | PPH22  | POC4   |
| [397] | PRE9   | PRE5    | [398] | POC4   | PRE2    | [399] | SPP381 | LSM5   |
| [400] | BRR2   | LSM5    | [401] | PRP31  | LSM5    | [402] | PRP8   | LSM5   |

|                    |                   |                       |
|--------------------|-------------------|-----------------------|
| [403] PRP3 LSM5    | [404] SNU23 LSM5  | [405] YHR140W YHL042W |
| [406] YHR140W SPC1 | [407] YHL042W     | EL01 [408] GPI8 SPC1  |
| [409] TSC13 SPC1   | [410] AGP1 SPC1   | [411] YPL264C SPC1    |
| [412] SPC1 GAS3    | [413] RPB5 RPC17  | [414] RPB5 RPC2       |
| [415] RPC17 RPC2   | [416] RPC2 RPB8   | [417] RPB2 RPB8       |
| [418] RPB4 RPB8    | [419] RPB8 IKI3   | [420] SMB1 DIB1       |
| [421] DIB1 SMD1    | [422] PH086 PFA4  | [423] ALG1 PFA4       |
| [424] GPI2 FET3    | [425] SUR2 FET3   | [426] ERG25 FET3      |
| [427] EL02 PFA4    | [428] PFA4 PH088  | [429] PFA4 YET1       |
| [430] SWD2 SHG1    | [431] SWD2 SDC1   | [432] SET3 CPR1       |
| [433] ZDS1 CPR1    | [434] ZDS1 HST1   | [435] ARC18 MY05      |
| [436] ARC15 MY05   | [437] ARC35 MY05  | [438] CDC28 ORC5      |
| [439] CDC28 ORC4   | [440] CDC28 ORC3  | [441] RRP43 RRP40     |
| [442] RRP6 RRP40   | [443] RRP4 RRP40  | [444] RRP40 CSL4      |
| [445] RRP40 SRP1   | [446] MUD1 SRP1   | [447] PRP40 SRP1      |
| [448] SMX2 SRP1    | [449] YHC1 SRP1   | [450] SNU71 SRP1      |
| [451] LUC7 SRP1    | [452] CDC27 APC9  | [453] APC4 CDC16      |
| [454] APC1 APC9    | [455] APC9 CDC26  | [456] APC9 DOC1       |
| [457] DNL4 ERB1    | [458] DNL4 GLC7   | [459] DNL4 NOP6       |
| [460] RPF2 GLC7    | [461] CIC1 NOP7   | [462] CIC1 TIF6       |
| [463] NOP2 NOP15   | [464] NOP2 GLC7   | [465] NOP15 GLC7      |
| [466] NOP15 NOP6   | [467] GLC7 NOP6   | [468] GLC7 TIF6       |
| [469] SIN4 SRB8    | [470] RGR1 SRB8   | [471] SRB8 SRB2       |
| [472] MAK21 NOP6   | [473] MAK21 TIF6  | [474] MAK21 CKA1      |
| [475] RPF2 NOP4    | [476] RPF2 CKA1   | [477] CIC1 HAS1       |
| [478] HAS1 YTM1    | [479] YTM1 SSF1   | [480] YTM1 CKA1       |
| [481] NOP15 SSF1   | [482] NOP15 CKA1  | [483] NOP4 NOP6       |
| [484] NOP4 TIF6    | [485] NOP6 SSF1   | [486] NOP6 CKA1       |
| [487] OST3 PKC1    | [488] OST4 PKC1   | [489] OST5 PKC1       |
| [490] PKC1 OST2    | [491] STT3 SWP1   | [492] SMX3 SMX2       |
| [493] SMX3 BRR2    | [494] SMX3 PRP8   | [495] SMX3 LSM8       |
| [496] SMX3 SNU66   | [497] SNU114 DIB1 | [498] PRP8 DIB1       |
| [499] LSM8 DIB1    | [500] SNU66 DIB1  | [501] DIB1 PRP4       |
| [502] RPN10 RPN1   | [503] RPN5 NAS6   | [504] RPN12 NAS6      |
| [505] RPN12 RPN1   | [506] PRE1 NAS6   | [507] RPN8 ATG12      |
| [508] RPN8 NAS6    | [509] RPN8 RPN1   | [510] ATG12 RPN9      |
| [511] ATG12 NAS6   | [512] RPN9 NAS6   | [513] RPN9 RPN1       |
| [514] RPN11 NAS6   | [515] RPN11 RPN1  | [516] NAS6 RPN1       |
| [517] NAS6 RPN6    | [518] RPN1 RPN6   | [519] SNU114 LSM4     |
| [520] PRP31 LSM4   | [521] PRP8 LSM4   | [522] PRP3 LSM4       |
| [523] LSM4 PRP4    | [524] DHH1 DCP2   | [525] DHH1 LSM8       |
| [526] TAF9 TAF14   | [527] TAF12 TAF14 | [528] TAF1 TAF14      |
| [529] TAF5 TAF14   | [530] TAF14 TAF13 | [531] TAF14 TAF6      |
| [532] RPN10 PUP1   | [533] RPN5 PUP1   | [534] PRE1 PUP1       |



|                     |                       |                     |
|---------------------|-----------------------|---------------------|
| [535] PUP1 SCL1     | [536] PUP1 PRE5       | [537] IFA38 SHR3    |
| [538] EMP24 AGP1    | [539] EMP24 AVT4      | [540] EMP24 COS8    |
| [541] EMP24 YPC1    | [542] GSF2 SHR3       | [543] SEC28 SEC21   |
| [544] SEC28 RET3    | [545] SEC28 SEC26     | [546] SEC22 BET1    |
| [547] SEC21 RET3    | [548] SEC21 SEC26     | [549] RET3 SEC26    |
| [550] CEF1 YJU2     | [551] SNT309 SNU114   | [552] SNT309 PRP45  |
| [553] SNU114 PRP19  | [554] SNU114 SYF1     | [555] RPF2 IPI3     |
| [556] ARX1 RIX1     | [557] ARX1 NOG1       | [558] ARX1 IPI3     |
| [559] ARX1 TIF6     | [560] RIX1 NOG1       | [561] NOG1 IPI3     |
| [562] NSA2 IPI3     | [563] RLP7 ARX1       | [564] RLP7 RIX1     |
| [565] RLP7 NOG1     | [566] ARX1 ERB1       | [567] SDA1 ERB1     |
| [568] ERB1 RIX1     | [569] ERB1 BUD20      | [570] MAK21 NUG1    |
| [571] MAK21 NOG1    | [572] HAS1 NUG1       | [573] HAS1 NOG1     |
| [574] NUG1 NOG1     | [575] NUG1 SSF1       | [576] NUG1 TIF6     |
| [577] NOG1 NOP7     | [578] ALG1 MST27      | [579] MST27 EL02    |
| [580] TP03 CAN1     | [581] PH086 SEC63     | [582] SEC63 STE24   |
| [583] SEC63 SHR3    | [584] STE24 SHR3      | [585] PH086 MST27   |
| [586] BSD2 SPC1     | [587] MST27 IFA38     | [588] MST27 AGP1    |
| [589] MST27 LAC1    | [590] MST27 SPC1      | [591] MST27 GAS3    |
| [592] MST27 EL03    | [593] LAC1 PH088      | [594] PH086 YIL171W |
| [595] GPI2 YIL171W  | [596] YHL042W YIL171W | [597] CAN1 YIL171W  |
| [598] SPC1 YIL171W  | [599] EL03 YIL171W    | [600] WBP1 AGP1     |
| [601] GPI2 PMP3     | [602] MED2 GAL4       | [603] MED2 ADA2     |
| [604] GAL11 ADA2    | [605] MED8 GAL4       | [606] MED8 ADA2     |
| [607] SRB5 ADA2     | [608] GAL4 MED7       | [609] RLP7 IPI3     |
| [610] YNL132W UTP20 | [611] NOP1 UTP20      | [612] RPB5 RPC3     |
| [613] RPC3 RPB8     | [614] RPN10 HSM3      | [615] RPN5 HSM3     |
| [616] RPT4 HSM3     | [617] PRE1 HSM3       | [618] UBP6 HSM3     |
| [619] HSM3 RAD23    | [620] HSM3 RPN11      | [621] HSM3 RPT1     |
| [622] RPA12 HHF1    | [623] RPA1 HHF1       | [624] HHF1 RPB10    |
| [625] RPB10 RPC19   | [626] SWD2 CLP1       | [627] DBP4 CLP1     |
| [628] CLP1 PAP1     | [629] CLP1 PFS2       | [630] CLP1 CFT2     |
| [631] CLP1 MPE1     | [632] CLP1 YTH1       | [633] CLP1 GLC7     |
| [634] CLP1 PTA1     | [635] CLP1 REF2       | [636] CLP1 PTI1     |
| [637] CLP1 FIP1     | [638] SPT5 CKA1       | [639] PAF1 CKA1     |
| [640] CDC73 CKA1    | [641] LE01 CKA1       | [642] SPT5 RPT1     |
| [643] RTF1 RPT1     | [644] CDC73 RPT1      | [645] CTR9 UTP22    |
| [646] SPT16 UTP22   | [647] TAF12 TAF11     | [648] TAF11 TAF6    |
| [649] ADR1 TAF11    | [650] ADR1 TAF13      | [651] TAF11 ADA2    |
| [652] RPN10 BUD32   | [653] RPT6 RPN7       | [654] RPN12 BUD32   |
| [655] PRE1 BUD32    | [656] YGL004C BUD32   | [657] ATG12 BUD32   |
| [658] BUD32 RPN7    | [659] BUD32 RPN3      | [660] BUD32 RPN11   |
| [661] RPN7 RPN1     | [662] RPN3 RPN1       | [663] PRP42 SRP1    |
| [664] PH086 ALG11   | [665] AGP1 ALG11      | [666] ERG25 ALG11   |

|       |         |        |       |         |         |       |         |         |
|-------|---------|--------|-------|---------|---------|-------|---------|---------|
| [667] | LAC1    | ALG11  | [668] | SPC1    | ALG11   | [669] | GAS3    | ALG11   |
| [670] | SAM3    | GPI2   | [671] | SAM3    | AVT4    | [672] | SAM3    | ERG25   |
| [673] | SAM3    | EL01   | [674] | ERG11   | ALG1    | [675] | ERG11   | YHR140W |
| [676] | ERG11   | TSC13  | [677] | ERG11   | IFA38   | [678] | ERG11   | ERG25   |
| [679] | ERG11   | EL01   | [680] | ERG11   | GAS3    | [681] | ERG11   | PH088   |
| [682] | MAK21   | DBP10  | [683] | HAS1    | NIP7    | [684] | HAS1    | DBP10   |
| [685] | ERB1    | NIP7   | [686] | ERB1    | DBP10   | [687] | NIP7    | NOP7    |
| [688] | NIP7    | DBP10  | [689] | NIP7    | TIF6    | [690] | NIP7    | CKA1    |
| [691] | RPN10   | RPN2   | [692] | RPT2    | RPN2    | [693] | RPT6    | RPN2    |
| [694] | RPN12   | RPN2   | [695] | RPN8    | RPN2    | [696] | RPN2    | RPT5    |
| [697] | RPN2    | UBP6   | [698] | RPN2    | RPN9    | [699] | RPN2    | HSM3    |
| [700] | RPN2    | RPN11  | [701] | RPN2    | RPN3    | [702] | RPN2    | RPN6    |
| [703] | RPN2    | RPT1   | [704] | RPF2    | YCR072C | [705] | RLP7    | YCR072C |
| [706] | RLP7    | NOP7   | [707] | ERB1    | YCR072C | [708] | ERB1    | IPI3    |
| [709] | RIX1    | NOP7   | [710] | NOP15   | YCR072C | [711] | YCR072C | NOG1    |
| [712] | YCR072C | NOP7   | [713] | YCR072C | TIF6    | [714] | NOP7    | NSA2    |
| [715] | NOP7    | IPI3   | [716] | ENP1    | LYS14   | [717] | YNL132W | LYS14   |
| [718] | YNL132W | UTP6   | [719] | UTP7    | LYS14   | [720] | LYS14   | UTP22   |
| [721] | SWC7    | ARP4   | [722] | SWC7    | ACT1    | [723] | SWC7    | EPL1    |
| [724] | SWR1    | EPL1   | [725] | PRP40   | PRP39   | [726] | SMX2    | PRP39   |
| [727] | SNU56   | PRP39  | [728] | PRP39   | CBC1    | [729] | PRP39   | CBC2    |
| [730] | PRP39   | PRP42  | [731] | RPB7    | RPC5    | [732] | RPB9    | RPC5    |
| [733] | RPC5    | RPB1   | [734] | GCN4    | MED7    | [735] | SRB7    | SRB4    |
| [736] | SRB7    | TAF5   | [737] | SRB7    | SRB2    | [738] | SRB7    | TAF6    |
| [739] | NGG1    | MED7   | [740] | SRB4    | TAF5    | [741] | SRB4    | TAF6    |
| [742] | TAF5    | MED7   | [743] | SRB2    | TAF6    | [744] | NOT2    | NOT3    |
| [745] | NOT2    | CAF130 | [746] | NOT3    | CCR4    | [747] | NOT5    | SSN2    |
| [748] | NOT5    | POP2   | [749] | SSN2    | NOT4    | [750] | SSN2    | NOT3    |
| [751] | SSN2    | CAF130 | [752] | NOT2    | POP2    | [753] | BOS1    | SAM1    |
| [754] | SAM1    | SEC22  | [755] | SAM1    | SEC21   | [756] | PRE6    | PRE4    |
| [757] | PRE6    | PUP3   | [758] | PRE4    | PRE9    | [759] | PRE9    | PUP3    |
| [760] | SMX3    | SMD1   | [761] | PRP31   | CUS1    | [762] | PRP6    | CUS1    |
| [763] | SMD1    | CUS1   | [764] | SLA1    | GCD7    | [765] | GTS1    | ABP1    |
| [766] | ABP1    | GCD7   | [767] | RVS167  | GCD7    | [768] | GCD7    | YSC84   |
| [769] | RSE1    | SMD2   | [770] | RSE1    | SMB1    | [771] | RSE1    | SNU71   |
| [772] | RSE1    | SMD3   | [773] | SMD2    | SMB1    | [774] | SMD2    | CUS1    |
| [775] | CBC1    | SMB1   | [776] | SMB1    | SNU71   | [777] | SNU71   | CUS1    |
| [778] | LUC7    | CUS1   | [779] | CTR9    | FKH1    | [780] | SPT16   | FKH1    |
| [781] | GPI8    | PMT7   | [782] | PMT7    | GPI2    | [783] | PMT7    | GAS3    |
| [784] | TSC13   | CH01   | [785] | IFA38   | CH01    | [786] | STE24   | CH01    |
| [787] | CH01    | EL01   | [788] | CH01    | EL02    | [789] | HCR1    | CKB2    |
| [790] | GCN4    | GAL4   | [791] | SRB4    | SPT15   | [792] | CIC1    | BRX1    |
| [793] | HAS1    | BRX1   | [794] | YTM1    | BRX1    | [795] | NOP7    | BRX1    |
| [796] | BRX1    | SSF1   | [797] | BRX1    | TIF6    | [798] | BRX1    | CKA1    |

|                    |                     |                    |
|--------------------|---------------------|--------------------|
| [799] PRE10 PUP3   | [800] NUP100 PRE8   | [801] KAP95 PRE8   |
| [802] PRE8 NUP2    | [803] PRE8 SRP1     | [804] PSE1 NUP2    |
| [805] RPT2 RPN7    | [806] RPT2 ECM29    | [807] RPT6 ECM29   |
| [808] PRE1 ECM29   | [809] YGL004C ECM29 | [810] RPN8 RPN7    |
| [811] RPN9 RPN7    | [812] RPN9 ECM29    | [813] RPN7 ECM29   |
| [814] RPN3 ECM29   | [815] RPT3 ECM29    | [816] AQY1 SHR3    |
| [817] ALG1 SHR3    | [818] TP01 AGP1     | [819] PH086 GAS2   |
| [820] ALG1 GAS2    | [821] ALG1 VAP1     | [822] GAS2 GPI8    |
| [823] GAS2 IFA38   | [824] GAS2 EMP24    | [825] GAS2 GSF2    |
| [826] GAS2 EL02    | [827] GAS2 PH088    | [828] GAS2 EL03    |
| [829] GAS2 YET1    | [830] VAP1 GPI8     | [831] VAP1 YHR140W |
| [832] VAP1 GPI2    | [833] VAP1 IFA38    | [834] VAP1 AGP1    |
| [835] VAP1 ERG25   | [836] VAP1 CAN1     | [837] VAP1 GAS3    |
| [838] VAP1 PH088   | [839] VAP1 NSG1     | [840] AGP1 CAN1    |
| [841] RPF2 URB1    | [842] RPF2 MAK5     | [843] MAK21 URB1   |
| [844] CIC1 URB1    | [845] HAS1 URB1     | [846] ERB1 URB1    |
| [847] URB1 YTM1    | [848] URB1 NOP7     | [849] MAK5 NOP7    |
| [850] SPP381 SMX2  | [851] SPP381 SMD1   | [852] PRP11 SMD1   |
| [853] RSE1 PRP11   | [854] RSE1 PRP21    | [855] SPP381 CDC48 |
| [856] SMX2 CDC48   | [857] PRP9 CDC48    | [858] ROX3 RPB1    |
| [859] MED2 RPB1    | [860] RGR1 RPB1     | [861] MED7 RPB1    |
| [862] RPT4 RPN1    | [863] RPT5 RPN1     | [864] UBP6 RPN1    |
| [865] UTP18 SRB4   | [866] CKA2 SRB4     | [867] SRB4 CKB1    |
| [868] SRB4 CKA1    | [869] CIC1 NOG1     | [870] YTM1 NOG1    |
| [871] NOP15 MAK5   | [872] MAK5 TIF6     | [873] MAK5 CKA1    |
| [874] LSM3 LEU2    | [875] KEM1 LEU2     | [876] LEU2 LSM4    |
| [877] NOG2 RLP7    | [878] NOG2 RIX1     | [879] NOG2 NOP15   |
| [880] NOG2 NOG1    | [881] SMB1 SNU66    | [882] ENP1 ASC1    |
| [883] UTP7 CBF5    | [884] UTP7 ASC1     | [885] PWP2 ASC1    |
| [886] CBF5 ASC1    | [887] NOP1 ASC1     | [888] HAS1 NOC2    |
| [889] NOP7 NOC2    | [890] YTM1 NOC2     | [891] NOP15 NOC2   |
| [892] NOC2 TIF6    | [893] NOC2 CKA1     | [894] AVT4 SPC1    |
| [895] COS8 SPC1    | [896] SPC1 YPC1     | [897] RPN1 ECM29   |
| [898] RPN5 GFA1    | [899] RPT6 GFA1     | [900] RPN12 GFA1   |
| [901] PRE1 GFA1    | [902] YGL004C GFA1  | [903] GFA1 RPN9    |
| [904] GFA1 RPN7    | [905] GFA1 RPN11    | [906] GFA1 RPN3    |
| [907] GFA1 RPT3    | [908] GFA1 RPN6     | [909] GFA1 RPT1    |
| [910] WBP1 TSC13   | [911] WBP1 YPL264C  | [912] WBP1 YPC1    |
| [913] PH086 SWP1   | [914] ALG1 SWP1     | [915] YHR140W SWP1 |
| [916] GPI8 SWP1    | [917] GPI2 SWP1     | [918] SUR2 TSC13   |
| [919] SUR2 YPC1    | [920] TP01 YPC1     | [921] TSC13 SWP1   |
| [922] YPL264C SWP1 | [923] YPL264C YPC1  | [924] ERG25 SWP1   |
| [925] GAS3 SWP1    | [926] SUR2 AVT4     | [927] SUR2 COS8    |
| [928] GSF2 EL01    |                     |                    |

**S4. PPIs predicted at least twice based on the prediction set N (N<sup>+</sup>)**

|              |         |               |         |             |         |
|--------------|---------|---------------|---------|-------------|---------|
| [1] RPN5     | RAD23   | [2] RPN12     | YGL004C | [3] RPN12   | UBP6    |
| [4] RPN12    | ATG12   | [5] PRE1      | YGL004C | [6] PRE1    | UBP6    |
| [7] PRE1     | ATG12   | [8] YGL004C   | UBP6    | [9] YGL004C | ATG12   |
| [10] YGL004C | RAD23   | [11] UBP6     | RAD23   | [12] UBP6   | RPN7    |
| [13] RAD23   | RPN7    | [14] RAD23    | RPN11   | [15] RPN7   | RPN11   |
| [16] LSM3    | SMD3    | [17] DCP1     | PRP24   | [18] DCP1   | SMD3    |
| [19] DCP1    | PAT1    | [20] LSM7     | SMD3    | [21] PRP24  | LSM4    |
| [22] PRP24   | LSM1    | [23] PRP24    | SMD3    | [24] PRP24  | PAT1    |
| [25] LSM1    | SMD3    | [26] SMD3     | PAT1    | [27] PH086  | ALG1    |
| [28] PH086   | TP01    | [29] PH086    | IFA38   | [30] PH086  | GSF2    |
| [31] ALG1    | GSF2    | [32] GPI8     | TP01    | [33] GPI8   | EMP24   |
| [34] GPI8    | YPL264C | [35] GPI8     | ERG25   | [36] GPI2   | TP01    |
| [37] GPI2    | TSC13   | [38] GPI2     | EMP24   | [39] TP01   | TSC13   |
| [40] TP01    | YPL264C | [41] IFA38    | EL02    | [42] IFA38  | PH088   |
| [43] IFA38   | EL03    | [44] IFA38    | YET1    | [45] EMP24  | YPL264C |
| [46] YPL264C | GAS3    | [47] GSF2     | EL02    | [48] GSF2   | PH088   |
| [49] GSF2    | YET1    | [50] EL02     | PH088   | [51] EL02   | EL03    |
| [52] EL02    | YET1    | [53] PH088    | EL03    | [54] PH088  | YET1    |
| [55] EL03    | YET1    | [56] SUI1     | SUA7    | [57] TIF34  | HCR1    |
| [58] SUA7    | HCR1    | [59] HCR1     | NIP1    | [60] PH086  | STE24   |
| [61] PH086   | EL01    | [62] ALG1     | STE24   | [63] ALG1   | AVT4    |
| [64] ALG1    | EL01    | [65] ALG1     | YPC1    | [66] BSD2   | YHR140W |
| [67] BSD2    | GPI8    | [68] BSD2     | AVT4    | [69] BSD2   | ERG25   |
| [70] BSD2    | COS8    | [71] GPI8     | AVT4    | [72] GPI8   | COS8    |
| [73] TSC13   | YPC1    | [74] IFA38    | STE24   | [75] STE24  | EL02    |
| [76] STE24   | PH088   | [77] STE24    | YET1    | [78] AVT4   | COS8    |
| [79] AVT4    | GAS3    | [80] ERG25    | COS8    | [81] ERG25  | EL01    |
| [82] COS8    | GAS3    | [83] EL01     | YPC1    | [84] GAS3   | YPC1    |
| [85] MUD1    | SMD2    | [86] MUD1     | LUC7    | [87] PRP40  | SNU56   |
| [88] PRP40   | SMD2    | [89] PRP40    | CBC2    | [90] PRP40  | PRP42   |
| [91] SMX2    | NAM8    | [92] SMX2     | CBC2    | [93] SMX2   | PRP42   |
| [94] SNU56   | SMD2    | [95] SNU56    | CBC1    | [96] SNU56  | PRP42   |
| [97] SMD2    | SNP1    | [98] SMD2     | PRP42   | [99] YHC1   | CBC2    |
| [100] CBC2   | PRP42   | [101] LSM3    | DCP2    | [102] KEM1  | DCP1    |
| [103] KEM1   | LSM6    | [104] KEM1    | LSM7    | [105] KEM1  | PRP24   |
| [106] KEM1   | LSM1    | [107] KEM1    | LSM5    | [108] DCP2  | LSM6    |
| [109] DCP2   | LSM7    | [110] DCP2    | PRP24   | [111] DCP2  | LSM5    |
| [112] GCN4   | SPT7    | [113] GCN4    | TAF10   | [114] TAF9  | SPT15   |
| [115] SPT7   | TAF1    | [116] SPT7    | SPT15   | [117] NGG1  | TAF10   |
| [118] SPT15  | TAF10   | [119] YHR140W | AGP1    | [120] TSC13 | AGP1    |
| [121] TSC13  | SHR3    | [122] AGP1    | AVT4    | [123] AGP1  | COS8    |
| [124] AGP1   | YPC1    | [125] EL02    | SHR3    | [126] SHR3  | PH088   |
| [127] SHR3   | EL03    | [128] SHR3    | YET1    | [129] BSD2  | YPL264C |

|                    |                    |                    |
|--------------------|--------------------|--------------------|
| [130] GPI8 CAN1    | [131] GPI2 NSG1    | [132] TSC13 CAN1   |
| [133] EMP24 CAN1   | [134] EMP24 NSG1   | [135] YPL264C NSG1 |
| [136] ERG25 CAN1   | [137] ERG25 NSG1   | [138] CAN1 GAS3    |
| [139] GCN4 TAF12   | [140] GCN4 TAF13   | [141] TAF9 TAF12   |
| [142] TAF12 ADA2   | [143] SPT15 TAF13  | [144] TAF13 ADA2   |
| [145] WBP1 YHR140W | [146] WBP1 GPI8    | [147] WBP1 ERG25   |
| [148] WBP1 GAS3    | [149] ALG1 SUR2    | [150] SUR2 ERG25   |
| [151] SUR2 GAS3    | [152] GPI8 CSG2    | [153] CSG2 COS8    |
| [154] COS8 CAN1    | [155] ALG1 AGP1    | [156] BSD2 AGP1    |
| [157] YHR140W LAC1 | [158] GPI8 AGP1    | [159] AGP1 YPL264C |
| [160] GSF2 LAC1    | [161] NSG1 YET1    | [162] SMX2 BRR2    |
| [163] SMX2 PRP8    | [164] SMX2 LSM8    | [165] SNU114 PRP6  |
| [166] SNU114 SMB1  | [167] SNU114 PRP3  | [168] PRP6 SMB1    |
| [169] PRP8 SMD1    | [170] LSM8 SMD1    | [171] SMB1 PRP3    |
| [172] SMB1 PRP4    | [173] PRP3 SMD1    | [174] SMD1 PRP4    |
| [175] RSE1 PRP43   | [176] RSE1 SNU114  | [177] PRP8 PRP45   |
| [178] SPP381 PRP8  | [179] SPP381 LSM8  | [180] SPP381 SMD3  |
| [181] SNU114 SNU66 | [182] SNU114 SNU23 | [183] PRP31 SNU23  |
| [184] PRP6 SNU66   | [185] PRP6 SNU23   | [186] PRP8 SNU23   |
| [187] LSM8 SNU23   | [188] PRP3 SNU66   | [189] PRP3 SNU23   |
| [190] RPN10 PPH22  | [191] RPN5 PPH22   | [192] RPN5 PUP3    |
| [193] RPN5 PRE8    | [194] PRE4 PUP3    | [195] PRE4 PRE5    |
| [196] PUP3 PRE5    | [197] EDC3 LSM4    | [198] EDC3 LSM1    |
| [199] RRP43 RRP6   | [200] RRP43 SKI7   | [201] RRP43 RRP42  |
| [202] RRP6 SKI7    | [203] RRP6 RRP4    | [204] RRP6 RRP42   |
| [205] SKI7 RRP42   | [206] SKI7 SRP1    | [207] RRP42 SRP1   |
| [208] YNL132W NOP1 | [209] UTP7 SOF1    | [210] KRR1 UTP22   |
| [211] SOF1 UTP22   | [212] TIF5 CKB2    | [213] SUI1 CKB2    |
| [214] TIF34 CKB2   | [215] SUA7 CKB2    | [216] PHO86 AQY1   |
| [217] PHO86 TP03   | [218] GPI2 TP03    | [219] SAM3 YHR140W |
| [220] SAM3 TSC13   | [221] SAM3 GAS3    | [222] GCN4 ADR1    |
| [223] TAF9 ADR1    | [224] NGG1 ADR1    | [225] RNA14 SWD2   |
| [226] RNA14 YTH1   | [227] RNA14 GLC7   | [228] RNA14 PTI1   |
| [229] SWD2 DBP4    | [230] SWD2 PCF11   | [231] SWD2 PAP1    |
| [232] SWD2 YTH1    | [233] SWD2 PTI1    | [234] SWD2 FIP1    |
| [235] CFT1 DBP4    | [236] DBP4 PCF11   | [237] DBP4 MPE1    |
| [238] DBP4 YTH1    | [239] PCF11 PFS2   | [240] PCF11 YTH1   |
| [241] PCF11 GLC7   | [242] PCF11 REF2   | [243] PCF11 PTI1   |
| [244] PCF11 FIP1   | [245] PFS2 GLC7    | [246] GLC7 PTI1    |
| [247] YSH1 PTI1    | [248] REF2 FIP1    | [249] GIN4 HSP26   |
| [250] BNI5 SHS1    | [251] BNI5 HSP26   | [252] CDC3 HSP26   |
| [253] SIN4 SRB2    | [254] ROX3 SRB6    | [255] ROX3 MED2    |
| [256] RGR1 SRB2    | [257] RRP43 MTR3   | [258] RRP6 MTR3    |
| [259] SKI7 MTR3    | [260] RRP4 MTR3    | [261] MTR3 SRP1    |

|       |         |         |       |         |       |       |         |        |
|-------|---------|---------|-------|---------|-------|-------|---------|--------|
| [262] | RPN10   | RPT5    | [263] | RPT2    | RPT4  | [264] | RPT2    | RPT6   |
| [265] | RPT2    | RPN8    | [266] | RPT2    | RPT5  | [267] | RPT2    | RPN9   |
| [268] | RPT2    | RPN3    | [269] | RPT4    | PRE1  | [270] | RPT4    | RPN8   |
| [271] | RPT4    | RPN9    | [272] | RPT4    | RAD23 | [273] | RPT4    | RPN3   |
| [274] | RPT4    | RPN11   | [275] | RPT6    | RPN8  | [276] | RPT6    | RPT5   |
| [277] | RPT6    | RPN9    | [278] | RPT6    | RPN3  | [279] | RPN8    | RPT5   |
| [280] | RPN8    | RPN3    | [281] | RPT5    | UBP6  | [282] | RPT5    | RPN9   |
| [283] | RPT5    | RPN3    | [284] | RPT5    | RPN11 | [285] | RPN9    | RPN3   |
| [286] | SWC4    | SAP185  | [287] | HTZ1    | ESA1  | [288] | HTZ1    | SAP185 |
| [289] | ACT1    | TRA1    | [290] | SAP185  | YAF9  | [291] | RVB2    | EPL1   |
| [292] | RPB7    | IKI3    | [293] | RPB9    | IKI3  | [294] | RPB3    | RPB1   |
| [295] | RPN10   | PRE10   | [296] | PRE6    | PRE9  | [297] | PRE6    | PRE5   |
| [298] | PRE10   | PRE9    | [299] | PRE10   | PRE8  | [300] | PRE9    | PRE5   |
| [301] | YHR140W | YHL042W | [302] | YHR140W | SPC1  | [303] | AGP1    | SPC1   |
| [304] | SPC1    | GAS3    | [305] | RPB5    | RPC17 | [306] | RPB5    | RPC2   |
| [307] | RPC17   | RPC2    | [308] | RPC2    | RPB8  | [309] | RPB2    | RPB8   |
| [310] | MUD1    | SRP1    | [311] | YHC1    | SRP1  | [312] | SNU71   | SRP1   |
| [313] | LUC7    | SRP1    | [314] | CIC1    | NOP7  | [315] | CIC1    | TIF6   |
| [316] | NOP2    | NOP15   | [317] | NOP15   | NOP6  | [318] | MAK21   | NOP6   |
| [319] | MAK21   | TIF6    | [320] | MAK21   | CKA1  | [321] | RPF2    | NOP4   |
| [322] | RPF2    | CKA1    | [323] | CIC1    | HAS1  | [324] | HAS1    | YTM1   |
| [325] | YTM1    | SSF1    | [326] | YTM1    | CKA1  | [327] | NOP15   | SSF1   |
| [328] | NOP15   | CKA1    | [329] | NOP4    | NOP6  | [330] | NOP4    | TIF6   |
| [331] | NOP6    | SSF1    | [332] | NOP6    | CKA1  | [333] | SMX3    | SMX2   |
| [334] | SMX3    | BRR2    | [335] | RPN10   | RPN1  | [336] | RPN12   | RPN1   |
| [337] | RPN8    | RPN1    | [338] | ATG12   | RPN9  | [339] | RPN9    | RPN1   |
| [340] | RPN11   | RPN1    | [341] | RPN1    | RPN6  | [342] | EMP24   | AGP1   |
| [343] | SEC28   | SEC21   | [344] | SEC28   | RET3  | [345] | SEC28   | SEC26  |
| [346] | SEC22   | BET1    | [347] | SEC21   | RET3  | [348] | SEC21   | SEC26  |
| [349] | RET3    | SEC26   | [350] | RPF2    | IPI3  | [351] | ARX1    | RIX1   |
| [352] | ARX1    | NOG1    | [353] | ARX1    | TIF6  | [354] | RIX1    | NOG1   |
| [355] | NOG1    | IPI3    | [356] | NSA2    | IPI3  | [357] | RLP7    | ARX1   |
| [358] | RLP7    | RIX1    | [359] | RLP7    | NOG1  | [360] | SDA1    | ERB1   |
| [361] | ERB1    | RIX1    | [362] | ERB1    | BUD20 | [363] | MAK21   | NOG1   |
| [364] | HAS1    | NOG1    | [365] | NOG1    | NOP7  | [366] | STE24   | SHR3   |
| [367] | WBP1    | AGP1    | [368] | RLP7    | IPI3  | [369] | YNL132W | UTP20  |
| [370] | RPN10   | HSM3    | [371] | RPN5    | HSM3  | [372] | RPT4    | HSM3   |
| [373] | PRE1    | HSM3    | [374] | UBP6    | HSM3  | [375] | HSM3    | RAD23  |
| [376] | HSM3    | RPN11   | [377] | HSM3    | RPT1  | [378] | TAF11   | TAF6   |
| [379] | RPN10   | BUD32   | [380] | RPT6    | RPN7  | [381] | RPN12   | BUD32  |
| [382] | PRE1    | BUD32   | [383] | YGL004C | BUD32 | [384] | ATG12   | BUD32  |
| [385] | BUD32   | RPN7    | [386] | BUD32   | RPN3  | [387] | BUD32   | RPN11  |
| [388] | RPN7    | RPN1    | [389] | RPN3    | RPN1  | [390] | SWC7    | ARP4   |
| [391] | SWC7    | ACT1    | [392] | SWC7    | EPL1  | [393] | SWR1    | EPL1   |

|                     |                   |                   |
|---------------------|-------------------|-------------------|
| [394] PRP40 PRP39   | [395] SMX2 PRP39  | [396] SNU56 PRP39 |
| [397] PRP39 CBC1    | [398] PRP39 PRP42 | [399] SRB4 TAF6   |
| [400] SRB2 TAF6     | [401] NOT2 NOT3   | [402] NOT2 CAF130 |
| [403] NOT3 CCR4     | [404] NOT5 SSN2   | [405] NOT5 POP2   |
| [406] SSN2 NOT4     | [407] SSN2 CAF130 | [408] NOT2 POP2   |
| [409] PRE6 PRE4     | [410] PRE6 PUP3   | [411] PRE4 PRE9   |
| [412] PRE9 PUP3     | [413] SMD1 CUS1   | [414] RPT2 RPN7   |
| [415] RPT2 ECM29    | [416] RPT6 ECM29  | [417] PRE1 ECM29  |
| [418] YGL004C ECM29 | [419] RPN8 RPN7   | [420] RPN9 RPN7   |
| [421] RPN9 ECM29    | [422] RPN7 ECM29  | [423] RPN3 ECM29  |
| [424] RPT3 ECM29    | [425] RPF2 MAK5   | [426] MAK5 NOP7   |
| [427] SPP381 SMX2   | [428] UBP6 RPN1   | [429] CIC1 NOG1   |
| [430] YTM1 NOG1     | [431] NOP15 MAK5  | [432] MAK5 TIF6   |
| [433] MAK5 CKA1     | [434] HAS1 NOC2   | [435] NOP7 NOC2   |
| [436] SUR2 TSC13    | [437] SUR2 YPC1   |                   |
